# 1 **MultiMAP: Dimensionality Reduction and Integration of Multimodal Data**

2  
3 Mika Sarkin Jain<sup>1,2\*</sup>, Krzysztof Polanski<sup>2</sup>, Cecilia Dominguez Conde<sup>2</sup>, Xi Chen<sup>2,3</sup>, Jongeun  
4 Park<sup>2,4</sup>, Lira Mamanova<sup>2</sup>, Andrew Knights<sup>2</sup>, Rachel A. Botting<sup>5</sup>, Emily Stephenson<sup>5</sup>, Muzlifah  
5 Haniffa<sup>2,5</sup>, Austen Lamacraft<sup>1</sup>, Mirjana Efremova<sup>2,6\*</sup>, Sarah A. Teichmann<sup>1,2\*</sup>

6  
7 Affiliations:

- 8 1. Theory of Condensed Matter, Dept Physics, Cavendish Laboratory, University of  
9 Cambridge, JJ Thomson Ave, Cambridge CB3 0HE, UK
- 10 2. Wellcome Sanger Institute, Wellcome Genome Campus, Hinxton, Cambridge CB10  
11 1SA, UK.
- 12 3. Southern University of Science and Technology, 1088 Xueyuan Ave, Nanshan,  
13 Shenzhen, Guangdong Province, China, 518055
- 14 4. KAIST, 291 Daehak-ro, Eoeun-dong, Yuseong-gu, Daejeon, South Korea
- 15 5. Biosciences Institute, Newcastle University, Newcastle upon Tyne, NE2 4HH, UK
- 16 6. Barts Cancer Institute, Queen Mary University of London, London, UK

17  
18 \*Co-corresponding authors: [mikasarkinjain@gmail.com](mailto:mikasarkinjain@gmail.com), [st9@sanger.ac.uk](mailto:st9@sanger.ac.uk),  
19 [m.efremova@qmul.ac.uk](mailto:m.efremova@qmul.ac.uk)

## 20 **Abstract**

21 Multimodal data is rapidly growing in many fields of science and engineering, including single-cell  
22 biology. We introduce MultiMAP, an approach for dimensionality reduction and integration of  
23 multiple datasets. MultiMAP recovers a single manifold on which all of the data resides and then  
24 projects the data into a single low-dimensional space so as to preserve the structure of the  
25 manifold. It is based on a framework of Riemannian geometry and algebraic topology, and  
26 generalizes the popular UMAP algorithm<sup>1</sup> to the multimodal setting. MultiMAP can be used for  
27 visualization of multimodal data, and as an integration approach that enables joint analyses.  
28 MultiMAP has several advantages over existing integration strategies for single-cell data,  
29 including that MultiMAP can integrate any number of datasets, leverages features that are not  
30 present in all datasets (i.e. datasets can be of different dimensionalities), is not restricted to a  
31 linear mapping, can control the influence of each dataset on the embedding, and is extremely  
32 scalable to large datasets. We apply MultiMAP to the integration of a variety of single-cell  
33 transcriptomics, chromatin accessibility, methylation, and spatial data, and show that it  
34 outperforms current approaches in preservation of high-dimensional structure, alignment of  
35 datasets, visual separation of clusters, transfer learning, and runtime. On a newly generated  
36 single-cell Assay for Transposase-Accessible Chromatin using sequencing (scATAC-seq) and  
37 single-cell RNA-seq (scRNA-seq) dataset of the human thymus, we use MultiMAP to integrate  
38 cells along a temporal trajectory. This enables the quantitative comparison of transcription factor  
39 expression and binding site accessibility over the course of T cell differentiation, revealing  
40 patterns of transcription factor kinetics.

41

## 42 Introduction

43

44 Multimodal data is rapidly growing in many fields of science and engineering, including single-cell  
45 biology. Emerging single-cell technologies are providing high-resolution measurements of  
46 different features of cellular identity, including single-cell assays for gene expression, protein  
47 abundance<sup>2,3</sup>, chromatin accessibility<sup>4</sup>, DNA methylation<sup>5</sup>, and spatial resolution<sup>6</sup>. Large scale  
48 collaborations including the Human Cell Atlas international consortium<sup>7,8</sup> are generating an  
49 exponentially increasing amount of data of many biological tissues, using a myriad of  
50 technologies. Each technology provides a unique view of cellular biology and has different  
51 strengths and weaknesses. Integrating these measurements in the study of a single biological  
52 system will open avenues for more comprehensive study of cellular identity, cell-cell interactions,  
53 developmental dynamics, and tissue structure<sup>9</sup>.

54

55 The integration of multi-omic data poses several challenges<sup>10</sup>. Different omics technologies  
56 measure distinct unmatched features with different underlying distributions and properties and  
57 hence produce data of different dimensionality. This makes it difficult to place data from different  
58 omics in the same feature space. Additionally, omics technologies can also have different noise  
59 and batch characteristics which are challenging to identify and correct. Further, as multi-omic data  
60 grows along two axes, the number of cells per omic and the number of omics per study, integration  
61 strategies need to be extremely scalable.

62

63 Most data integration methods project multiple measurements of information into a common low-  
64 dimensional representation to assemble multiple modalities into an integrated embedding space.  
65 Recently published methods employ different algorithms to project multiple datasets into an  
66 embedding space, including canonical correlation analysis (CCA)<sup>11</sup>, nonnegative matrix  
67 factorization (NMF)<sup>12</sup> or variational autoencoders<sup>13</sup>. In the field of genomics, single-cell  
68 transcriptomics, as a well-established method, often serves as a common reference, facilitating  
69 the transfer of cell type annotation and data across multiple technologies and modalities. While  
70 these methods can be tremendously powerful, they require correspondence between the features  
71 profiled across omics technologies. Another limitation of many existing methods is they are  
72 challenged by scaling to large datasets.

73

74 Here we introduce a method that overcomes all these limitations: MultiMAP, an approach for the  
75 dimensionality reduction and integration of multiple datasets. MultiMAP integrates data by  
76 constructing a non-linear manifold on which diverse high-dimensional data reside and then  
77 projecting the manifold and data into a shared low-dimensional space. In contrast to other  
78 integration strategies for single-cell data, MultiMAP can integrate any number of datasets, is not  
79 restricted to a linear mapping, leverages features that are not present in all datasets (*i.e.* datasets  
80 can be of different dimensionalities), can control the influence of each dataset on the embedding,  
81 and is effortlessly scalable to large datasets. The ability of MultiMAP to integrate datasets of  
82 different dimensionalities allows the strategy to leverage information that is not considered by  
83 methods that operate in a shared feature space. (e.g. MultiMAP can integrate the 20,000-feature  
84 gene space of scRNAseq data together with a 100,000-feature peak space of scATACseq data).

85  
86 We apply MultiMAP to challenging synthetic multimodal data, and demonstrate its ability to  
87 integrate a wide range of single-cell omics datasets. Finally, we apply the approach to the study  
88 of T cell development with new scATACseq data from fetal thymi. We show that MultiMAP can  
89 co-embed datasets across different technologies and modalities, while at the same time  
90 preserving the structure of the data, even with extensive biological and technical differences. The  
91 resulting embedding and shared neighborhood graph (MultiGraph) can be used for simultaneous  
92 visualisation and integrative analysis of multiple datasets. With respect to single cell genomics  
93 data, this allows for standard analysis on the integrated data, such as cluster label transfer, joint  
94 clustering, and trajectory analysis.  
95

## 96 Results

97

### 98 The MultiMAP Framework

99

100 We introduce MultiMAP, an approach for integration and dimensionality reduction of multimodal  
101 data based on a framework of Riemannian geometry and algebraic topology. MultiMAP takes as  
102 input any number of datasets of potentially differing dimensions. MultiMAP recovers geodesic  
103 distances on a single latent manifold on which all of the data is uniformly distributed. The distances  
104 are calculated between data points of the same dataset by normalizing distances with respect to  
105 a neighborhood distance specific to the dataset, and between data points of different datasets by  
106 normalizing distances between the data in a shared feature space with respect to a neighborhood  
107 parameter specific to the shared feature space. These distances are then used to construct a  
108 neighborhood graph (MultiGraph) on the manifold. Finally, the data and manifold space are  
109 projected into a low-dimensional embedding space by minimizing the cross entropy of the graph  
110 in the embedding space with respect to the graph in the manifold space. MultiMAP allows the  
111 user to modify the weight of each dataset in the cross entropy loss, allowing the user to modulate  
112 the contribution of each dataset to the layout. Integrated analysis can be performed on the  
113 embedding or the graph, and the embedding also provides an integrated visualization. The  
114 mathematical formulation of MultiMAP is elaborated in Supplementary Methods.  
115

116 In order to study MultiMAP in a controlled setting, we first applied it to two synthetic examples of  
117 multimodal data (Methods). The first synthetic data consists of points sampled randomly from the  
118 canonical 3D “Swiss Roll” surface and the 2D rectangle (Figure 2a). The dataset is considered  
119 multimodal data, because samples are drawn from different feature spaces but describe the same  
120 rectangular manifold. In addition, we are given the position along the manifold of 1% of the data.  
121 This synthetic setting illustrates that MultiMAP can integrate data in a nonlinear fashion and  
122 operate on datasets of different dimensionality, because data points along a similar position on  
123 the manifold are near each other in the embedding (Figure 2b). The MultiMAP embedding

124 properly unrolls the Swiss Roll dataset, indicating that the projection is nonlinear. The embedding  
125 also appears to preserve aspects of both datasets; the data is curved and at the same time  
126 unrolled.

127  
128 To determine if MultiMAP can effectively leverage features unique to certain datasets, we used  
129 the MNIST database<sup>14</sup>, where handwritten images were split horizontally with thin overlap (Figure  
130 2c; see Methods for details). The two datasets can be considered multimodal because they have  
131 different feature spaces but describe the same set of digit images. The thin overlapping region of  
132 the two halves is not enough information to create a good embedding of the data (Figure 2c).  
133 Many distinct digits are similar in this thin central sliver, and hence they cluster together in the  
134 feature space of this sliver. Indeed, in a UMAP projection of the data in the shared feature space  
135 of this overlap, the clusters of different digits are not as well separated as in the UMAP projections  
136 of each half (Figure 2c).

137  
138 A multimodal integration strategy that effectively leverages all features would use the features  
139 unique to each half to separate different digits, and the shared space to bring the same digits from  
140 each dataset close together (Figure 2d). We show that with MultiMAP the different modalities are  
141 well mixed in the embedding space and the digits cluster separately, despite mostly different  
142 feature spaces and noise being added to only the second dataset. This indicates that MultiMAP  
143 is leveraging the features unique to each dataset and is also robust to datasets with different  
144 noise.

145  
146 Moreover, MultiMAP has weight parameters  $\omega^v$  which control the contribution of each dataset  $\mathbf{X}^v$   
147 to the final embedding, allowing the user to modulate which dataset has a greater influence on  
148 the MultiMAP embedding. When a dataset's weight is larger, its structure has a larger contribution  
149 to the MultiMAP embedding. Our results show that when integrating the MNIST data, for different  
150 choices of  $\omega^v$ , the datasets remain well integrated in the embedding space (Extended Data Figure  
151 1a,b).

152  
153 Finally, to illustrate that our assumption of a shared manifold is robust to variable levels of overlap  
154 across datasets, we used MultiMAP to integrate datasets with varying numbers of shared clusters  
155 in the MNIST data (Extended Data Figure 2). Our results show that MultiMAP is able to effectively  
156 integrate datasets that have only 1 out of 10 clusters shared between them. The transfer accuracy,  
157 silhouette score, and structure score of the MultiMAP integration remained largely constant as  
158 the number of overlapping clusters is varied, demonstrating that MultiMAP is highly robust to  
159 differences in populations between datasets.

160  
161



162

## 163 MultiMAP integration of single-cell transcriptomics and chromatin 164 accessibility

165

166 Having shown that MultiMAP succeeds in integrating synthetic data, we apply the technique to  
167 real biological data. Epigenomic regulation underlies gene expression and cellular identity. Hence,  
168 integration of single-cell transcriptomics and epigenomics data provides an opportunity to  
169 investigate how epigenomic alterations regulate gene expression to determine and maintain cell  
170 identity. In addition, effective integration with transcriptomics data can improve the sensitivity and  
171 interpretability of the sparse scATAC-seq data.

172

173 To assess MultiMAP's ability to integrate transcriptomic and epigenomic data, we applied the  
174 approach to integrate our previously generated high-coverage scATAC-seq data of mouse  
175 splenocytes<sup>15</sup> and generated corresponding single-cell transcriptomic profiles of the same tissue.  
176 The high coverage of the plate-based scATAC-seq data as well as the published cluster  
177 annotations of the subpopulations served as a good ground truth example to validate our method.  
178 The analysis of the transcriptomics data revealed similar subpopulations to the published  
179 scATAC-seq dataset, in addition to two RNA-specific clusters: a subpopulation of B cells with  
180 higher expression of Interferon-Induced (Ifit) genes and a subpopulation of proliferating cells  
181 (Extended Data Figure 3a,b).

182

183 MultiMAP effectively integrated the two datasets, using both gene activity scores and the cell type-  
184 specific epigenetic information outside of gene bodies. The different modalities are well mixed in  
185 the embedding space and cells annotated as the same type are close together, regardless of the  
186 modality for different choices of  $\omega^v$  (Figure 3a, Extended Data Figure 1c,d). Next, we jointly  
187 clustered cells from both datasets using the MultiGraph. This produced clusters with markers  
188 corresponding to known cell types<sup>15</sup> (Extended Data Figure 3c). The annotations produced by this  
189 joint clustering were generally consistent with independent annotations of each dataset (Figure  
190 3c). Two of the clusters determined to be proliferating cells and B cells with upregulated Ifit genes  
191 were found only in the scRNA-seq data, as expected (Figure 3a, Extended Data Figure 3b). In  
192 addition, the integration produced by MultiMAP is robust to different choices of the weight  
193 parameters (Extended Data Figure 1c).

194

195 Further, we used the MultiGraph to directly predict the cell types of the scATAC-seq given the cell  
196 types of the scRNA-seq. Figure 3d shows the confusion matrix of the predictions, illustrating that  
197 cells were generally annotated correctly. This illustrates the ability of MultiMAP to leverage  
198 annotation efforts of one omic technology to inform those of another. Interestingly, a small subset  
199 of cells from scRNA-seq previously annotated as T cells is now clearly separated on the MultiMAP  
200 plot, and clusters close to the B cells (Figure 3a, Extended Data Figure 3). Doublet detection  
201 confirmed that this cluster is composed of doublet T/B cells. These doublets are spread  
202 throughout the UMAP plot of the scRNA-seq data, but are clearly distinct on the MultiMAP plot

203 (Extended Data Figure 3). This illustrates the power of MultiMAP both as a visualization tool, and  
204 to reveal new populations of cells.

205  
206 Next, we applied MultiMAP to integration of multiple batches from each data modality, to assess  
207 the ability to account for batch effects. For this purpose, we used recently published scRNA-seq  
208 and scATAC-seq data of human bone marrow and peripheral blood mononuclear cells<sup>16</sup>. This  
209 dataset consists of 16 experimental samples, representing different experimental batches.  
210 Another challenge is that cells are not in discrete clusters but rather on a continuum. MultiMAP is  
211 able to simultaneously correct batch effects and modality differences, integrating all 16 datasets  
212 into a consistent embedding (Figure 3e). The different modalities are well mixed in the embedding  
213 and cells of the same type are close together, regardless of modality or batch. The cell type  
214 annotations of all of the data were taken from the original publication<sup>16</sup>, so they provide a good  
215 ground truth and independent validation of MultiMAP. Additionally, MultiMAP is able to correct  
216 batch effects present in different omics technologies. Applying MultiMAP to just the scRNA-seq  
217 data produces embedding that properly integrates cells of the same type regardless of batch, and  
218 the same is true when MultiMAP is applied to only the scATAC-seq data (Figure 3f). It is also  
219 evident in this figure that clusters with cell types unique to a batch remain unmixed in the  
220 embedding. This indicates that MultiMAP is not forcing incompatible data to integrate and  
221 demonstrates that MultiMAP can integrate datasets even if they have extensive technical  
222 differences.

## 223 MultiMAP integration of multiple modalities of mouse brain cells

224  
225 Recent advances in spatial sequencing technology enable the simultaneous measurement of  
226 gene expression and spatial locations of single-cells, facilitating the study of tissue structure<sup>6</sup>.  
227 While these technologies provide spatial information, they often measure only a small fraction of  
228 the genes measured by scRNA-seq. Integration of spatial measurements and scRNA-seq has the  
229 potential to provide spatial context to scRNA-seq data as well as to reveal finer grained biological  
230 differences in the spatial data by leveraging the greater number of cells and genes present in  
231 scRNA-seq data.

232  
233 We applied MultiMAP to the integration of a Drop-seq scRNA-seq data of the mouse frontal  
234 cortex<sup>17</sup> and STARmap *in situ* gene expression dataset<sup>18</sup>. Despite the differences between the  
235 two dataset in the number of measured genes (only 1020 in STARmap) and the number of cells  
236 (71640 in Drop-seq versus 2137 in STARmap), our integrated analysis shows that MultiMAP  
237 successfully integrates the datasets. Clustering the integrated data using the MultiGraph  
238 produced clusters with markers corresponding to known cell types (Figure 4a,b). One of the  
239 clusters, the claustrum, was found only in the scRNA-seq data, as expected. Integration with  
240 MultiMAP also resulted in improved cluster annotation for both datasets. The excitatory L4  
241 neurons were previously only present in the STARMap data, as the motor cortex and prefrontal  
242 cortex that are part of the frontal cortex are considered to lack a layer 4 in mice<sup>19</sup>. However, after  
243 the integration we also identified L4 cells in the scRNA-seq data previously annotated as L5  
244 neurons (Figure 4a,c, Extended Data Figure 4). A similar population of pyramidal cells located

245 between layers 3 and 5 were recently identified both with anatomical and single-cell studies<sup>20,21</sup>.  
246 This was confirmed by expression of marker genes associated with L4, including *Cux2* and *Rorb*  
247 (Extended Data Figure 4). This illustrates the power of MultiMAP to reveal new cell types.

248  
249 MultiMAP also improves visualization of the STARmap data. Before integration with MultiMAP,  
250 many of the cell types of the spatial data did not cluster separately and were visually hard to  
251 distinguish. In comparison, the MultiMAP embedding of the STARmap data exhibits tighter cell  
252 type clusters and increased separation between cell types (Figure 4e). This improvement was  
253 measured by the average Silhouette score in the embedding space, which is significantly larger  
254 for MultiMAP (Figure 4e).

255  
256 Integration with MultiMAP also enabled us to spatially locate all the joint cell types in the  
257 STARmap data, allowing study of the spatial structure of the tissue (Figure 4d). The pyramidal  
258 neurons localize to layers 2-6 and oligodendrocytes localize to the layer below the cortex,  
259 whereas the interneurons do not appear to exhibit spatial organization. These observations are  
260 all consistent with the known spatial architecture of the mouse visual cortex<sup>18</sup>.

261  
262 To investigate the performance of MultiMAP on the integration of more than two modalities, we  
263 applied the approach to integrate recently published multi-omics datasets of the mouse primary  
264 motor cortex<sup>20</sup> consisting of 9 separate datasets, including 7 single-cell or single-nucleus  
265 transcriptomics datasets, one single-nucleus chromatin accessibility, and one single-nucleus  
266 DNA methylation (snmC-seq). MultiMAP successfully co-embedded more than 600,000 single-  
267 cell or -nucleus samples assayed by six molecular modalities and identified the previously  
268 published cell subpopulations. The MultiMAP embedding displays good mixing of clusters from  
269 different modalities when the clusters correspond to the same cell type. Cell type annotations  
270 were taken from the original publication of the data, so they provide a good ground truth and an  
271 independent validation of MultiMAP. We further see that cell types that exist in one modality, but  
272 not in the others, are not falsely aligned in the embedding space. This indicates that MultiMAP is  
273 not forcing incompatible data to integrate.

274  
275 Finally, using the integration of scRNA-seq with the STARmap data, as well as the integration of  
276 the multi-omics spleen data, we assessed the impact of using only shared vs. all features. We  
277 find that using all features greatly improves the integration and results in embeddings that are  
278 visually and quantitatively superior, according to four performance metrics (Extended Data Figure  
279 5). This illustrates that non-shared features can be extremely helpful, and demonstrates an  
280 advantage of MultiMAP over other methods which do not consider non-shared features.

281

## 282 Benchmarking

283  
284 We assessed and benchmarked the performance of MultiMAP against several popular  
285 approaches for integrating single-cell multi-omics, including Seurat<sup>311</sup>, LIGER<sup>12</sup>, Conos<sup>22</sup> and  
286 GLUER<sup>23</sup>.

287

288 These integration approaches differ in key regards, summarized in Figure 5d. We used a diversity  
289 of performance metrics to comprehensively compare MultiMAP with other approaches, including  
290 transfer accuracy, silhouette score, alignment, preservation of the structure, and runtime. With  
291 these metrics, we quantified the separation of the joint clusters, how well mixed the datasets were  
292 after integration and how well they preserved the structure in the original datasets to investigate  
293 whether the methods integrate populations across datasets without blending distinct populations  
294 together.

295

296 To this end, we generated single-nucleus data from human Peripheral Blood Mononuclear Cells  
297 (PBMCs) using the Multiome ATAC + RNA kit. We obtained a PBMC atlas of 6,344 nuclei of high-  
298 quality ATAC + RNA profiles. We analysed and annotated the RNA and ATAC data separately,  
299 revealing all the known major PBMC types: CD14 and CD16 monocytes, cDCs and pDCs, naive  
300 and effector CD4 and CD8 T cells, Tregs, MAIT and gamma-delta T cells, NK and ILCs, naive  
301 and memory B cells and plasmablasts (Extended Data Figure 6a). Most cell types were well  
302 separated in both modalities with the exception of the NK and ILC clusters and the gamma-delta  
303 and the CD8 effector T cells that blended together in the ATAC data.

304

305 We used the PBMCs as a gold standard dataset to benchmark MultiMAP against the four other  
306 methods. As shown in the co-embedding and the metrics, MultiMAP successfully integrated the  
307 cell types across modalities and outperformed other methods (Extended Data Figure 6b,c). The  
308 label transfer accuracy was particularly striking, with MultiMAP achieving a much higher score  
309 compared to other methods.

310

311 Furthermore, we also benchmarked MultiMAP using a variety of multi-omic data with published  
312 cell type annotations, including the transcriptomics and chromatin accessibility spleen data,  
313 scRNA-seq and STARmap of the visual cortex, and the multi-omics data of the primary cortex.  
314 For all datasets, MultiMAP achieves top or near top performance on all metrics (Figure 5a,b). The  
315 embeddings produced by MultiMAP prove superior for transferring cell type annotations between  
316 datasets, separating clusters of different cell populations, integrating datasets in a well-mixed  
317 manner, and capturing the high-dimensional structure of each dataset. Critically, MultiMAP is  
318 faster than all other benchmarked methods, and significantly faster than LIGER and Seurat 3  
319 (Figure 5c). Seurat 3 and LIGER were not able to scale to the primary cortex data of 600k,  
320 producing out-of-memory errors despite access to 218 GB of RAM.

321

322 Finally, to assess the batch correction performance of MultiMAP, we also applied it on three  
323 scRNA-seq studies of the human pancreas<sup>24-26</sup> that were recently used for comparison of eight  
324 batch correction methods<sup>27</sup>. Even though the main purpose of MultiMAP is the integration of  
325 several different omic technologies, MultiMAP outperformed all other well established batch  
326 correction methods in the field, demonstrating that MultiMAP can correct batches and integrate  
327 multiple omics data simultaneously (Extended Data Figure 7).

## 328 MultiMAP reveals patterns of T cell maturation along a multi-omic 329 trajectory

330

331 Single-cell transcriptomics has enabled reconstruction of developmental trajectories and the  
332 study of dynamic processes such as differentiation and reprogramming. Bulk RNA-seq and  
333 ATAC-seq data has further revealed regulatory events driving these processes<sup>28</sup>. However, joint  
334 analysis of single-cell expression and chromatin accessibility profiles along a time course  
335 trajectory would allow the study of dynamic chromatin regulation alongside gene expression and  
336 elucidate epigenomic drivers of transcriptional change<sup>29,30</sup>.

337

338 In order to investigate the potential of integrating multi-omic data along a common differentiation  
339 trajectory, we focused on T cell development in the thymus. The thymus is an organ essential for  
340 the maturation and selection of T cells. Precursor cells migrate from the fetal liver and bone  
341 marrow to the thymus where they develop into different types of mature T cells<sup>31</sup>. We recently  
342 provided a comprehensive single-cell transcriptomics atlas of the human thymus during  
343 development, childhood, and adult life, and computationally predicted the trajectory of T cell  
344 development from early progenitors to mature T cells<sup>31</sup>. To expand on this and further investigate  
345 the gene regulatory mechanisms driving T cell development, we generated single-cell  
346 transcriptomics and chromatin accessibility data from a human fetal thymus sample at 10 weeks  
347 of gestation.

348

349 Clustering of the scRNA-seq data revealed cell types identified in our recently published  
350 transcriptomic cell atlas of the thymus<sup>31</sup>, including several clusters of T cells across different  
351 stages of development, fibroblasts, endothelial cells, erythrocytes, thymic epithelial cells (TECs),  
352 NK and ILC3 cells, and macrophages and dendritic cells (Extended Data Figure 8). The sparse  
353 scATAC-seq and the continuous nature of cell types along the maturation trajectory made it  
354 difficult to cluster the ATAC cells into different T cell types (Extended Data Figure 8). However,  
355 the integration with MultiMAP and the joint clusters obtained using the MultiGraph corresponded  
356 to the published thymus cell types<sup>31</sup> (Figure 6 a,b), allowing us to correctly annotate the cell types  
357 of the scATAC-seq data.

358

359 We then selected the T cell populations identified from the joint clustering and performed diffusion  
360 map pseudotime analysis using the alignment MultiMAP graph. The reconstructed development  
361 trajectory showed a continuous differentiation with the same trend as the published study, starting  
362 from early double negative (DN) CD4-CD8-, gradually progressing to double positive (DP)  
363 CD4+CD8+ T cells, and then differentiating into single positive (SP) mature CD8+ or CD4+ T  
364 cells. Hallmark genes of T cell differentiation varied along the inferred pseudotime in a manner  
365 consistent with<sup>31</sup> (Figure 6d), serving as validation of the trajectory inference and the integration  
366 produced by MultiMAP.

367

368 To identify transcription factors (TFs) that potentially regulate T cell development, we studied  
369 changes in TF expression and TF binding site accessibility along the differentiation trajectory. The  
370 top variable TFs/TF binding sites along the trajectory included many TFs that have been



371 previously shown to be involved in T cell differentiation, including GATA3, SPI1, MEF2C, ERG,  
372 TCF3, TCF4, TFAP4, MYBL2, STAT1, NR4A2 and others<sup>28,31,32</sup> (Figure 6e, Extended Data Figure  
373 9). The TFs that most varied along the trajectory were found to show changes in motif accessibility  
374 at the transition between the late DN and early DP stage of differentiation as shown before<sup>32</sup>.

375  
376 Moreover, our integrated trajectory allowed us to identify TFs where changes in motif accessibility  
377 and expression of the TF itself were closely coordinated, for example ZEB1, IRF1, REL, FOS and  
378 others, suggesting that these TFs actively regulate their target genes immediately and directly  
379 (Figure 6e). In contrast, for TFs such as ETS1, JUN etc., gene expression of the TF significantly  
380 precedes the accessibility of the corresponding TF binding sites, suggesting that additional  
381 regulatory mechanisms are potentially required for opening of the TF motifs.  
382

## 383 Discussion

384  
385 Here we present a novel approach for dimensionality reduction and integration of multimodal data  
386 which takes into account the full data sets, even when they have different feature spaces.  
387 MultiMAP embeds all datasets into a shared space to preserve both the manifold structure of  
388 each dataset independently, as well as in shared feature spaces. This enables both visualization  
389 and streamlined downstream analyses. Crucially, our method can incorporate different types of  
390 features, such as gene expression and open chromatin peaks or intergenic methylation, and thus  
391 takes advantage of the full power of multi-omics data. Ignoring the features unique to one dataset  
392 (as in most existing methods), may omit important information, for instance distinguishing features  
393 of certain subpopulations of cells and yield an integrated embedding that does not distinctly  
394 cluster all subpopulations.

395  
396 An additional advantage of MultiMAP is that the influence of each dataset on the shared  
397 embedding can be modulated. This is useful when integrating datasets of different qualities, or  
398 when aligning a query dataset to a reference dataset. Comparison with existing methods for  
399 integration shows that MultiMAP outperforms or has close to best performance in every aspect  
400 investigated. MultiMAP is a robust and effective method for dimensionality reduction and  
401 integration of multimodal data, and is extremely fast and scalable to massive datasets.  
402

403 Using synthetic examples to illustrate the power of the method, we show that MultiMAP leverages  
404 the features unique to each dataset to effectively integrate and reduce the dimensionality of the  
405 data, and is also robust to data with noise. Throughout our applications of MultiMAP to diverse  
406 single-cell multi-omic data, we demonstrate that our method can facilitate integration across  
407 transcriptomic, epigenomic, and spatially resolved datasets, and derive biological insights jointly  
408 from multi-omic single-cell data. In addition, our method can align datasets across different  
409 technologies and modalities even with extensive biological and technical differences. Crucially,  
410 we show that MultiMAP is flexible enough to integrate datasets with different clusters and cell  
411 populations, illustrating that MultiMAP is applicable even when its central hypothesis is not strictly



412 reflected by the data. The multimodal integration of three or more omics technologies opens many  
413 opportunities for the comprehensive study of tissues.

414  
415 We note that our method is based on the hypothesis that multi-omics data are uniformly distributed  
416 on a latent manifold. A hypothesis of this sort, about the distribution of data in a latent space, is a  
417 central feature of many existing integration strategies. For example, CCA-based strategies  
418 (including Seurat and Conos) assume that the data reside in a maximally-correlated manner in a  
419 latent space which is a linear projection of the original data. MultiMAP, in contrast, does not make  
420 as strong an assumption because we do not restrict the latent manifold to a linear projection of  
421 the data. While this kind of hypothesis is often realistic for data generated from the same tissue,  
422 there may be cases where this is not strictly the case. In practice, we find that MultiMAP can  
423 successfully accommodate datasets that depart from this central hypothesis, *i.e* when clusters  
424 and cell populations are not shared across all datasets that are being integrated.

425  
426 Perhaps the greatest potential lies in applying MultiMAP to datasets beyond those considered  
427 here. Integrative analysis with MultiMAP can be used to compare healthy and diseased states,  
428 and identify pathologic features, or to uncover cell-type specific responses to perturbations. Other  
429 examples include the integration of data across species to enable studying the evolution of cell  
430 states and identifying conserved cell types and regulatory programs. Along similar lines, the  
431 integration of *in vivo* with *in vitro* models such as organoids will reveal the quality or faithfulness  
432 of cells in a dish relative to their native counterparts. Finally, given the rapid development of joint  
433 multimodal single cell genomics methods (e.g. CITEseq for protein and RNA, joint snRNA- and  
434 ATACseq), it is relevant to point out that MultiMAP can be applied to multi-omic data acquired  
435 both from different cells as well as from the same cells.

436  
437 In summary, given the broad appeal of dimensionality reduction methods (e.g. PCA, tSNE,  
438 UMAP), and the growth of multimodal data in many areas of science and engineering, we  
439 anticipate that MultiMAP will find wide and diverse use.

#### 440 441 AUTHOR CONTRIBUTIONS

442  
443 M.S.J., M.E. and S.A.T. conceived the study. M.S.J conceived and developed MultiMAP. M.S.J,  
444 created the codebase with contributions from M.E., and K.P. C.D.C., J.-E.P., R.A.B, E.S, L.M.,  
445 A.E. and X.C. generated the single cell data. M.E. analysed the data and interpreted the results  
446 with contributions from M.S.J. and S.A.T. M.S.J., M.E. and S.A.T. wrote the manuscript with  
447 contributions from A.L., X.C., and C.D.C. All authors read and accepted the manuscript.

#### 448 DATA AVAILABILITY

449  
450 scRNA-seq and scATAC-seq data generated for this publication were being deposited in  
451 ArrayExpress: E-MTAB-9769 for scRNA-seq of mouse splenocytes, E-MTAB-9840 and E-MTAB-  
452 9828 for scRNA-seq and scATAC-seq of the thymus (username: [me5@sanger.ac.uk](mailto:me5@sanger.ac.uk); password:  
453 rmachcde). The Multiome RNA+ATAC PBMC data is in the process of being deposited.

454 CODE AVAILABILITY

455

456 MultiMAP is publicly available at [github.com/Teichlab/MultiMAP](https://github.com/Teichlab/MultiMAP).

457

458 ACKNOWLEDGEMENTS

459

460 We thank Jana Eliasova for the graphical illustrations. We are grateful to Emma Dann, Natsuhiko  
461 Kumasaka and Zhihan Xu for critical feedback on the manuscript. We thank Ruben Chazarra-Gil  
462 and Vladimir Yu Kiselev for the comparison of different batch correction methods on the pancreas  
463 dataset. M.S.J. was supported by a Gates Cambridge Scholarship. J.-E.P. was supported by  
464 EMBO Long-Term and Advanced Fellowships. M.E. is funded by Barts Charity. S.A.T. is funded  
465 by Wellcome (WT206194). The study was supported by Wellcome Human Cell Atlas Strategic  
466 Science Support (WT211276/Z/18/Z) and the Chan Zuckerberg Initiative (CZF2019-002445).

467

468 COMPETING INTEREST STATEMENT

469

470 S.A.T. has received remunerations for consulting and Scientific Advisory Board work from  
471 Genentech, Biogen, Roche and GlaxoSmithKline as well as Foresite Labs over the past three  
472 years.

473

474

475

476

477

478

479

480

481

482

483

484

485

486

487

488

489

490

491

492

493

494

495

496

497

498 **Figures**

499

500

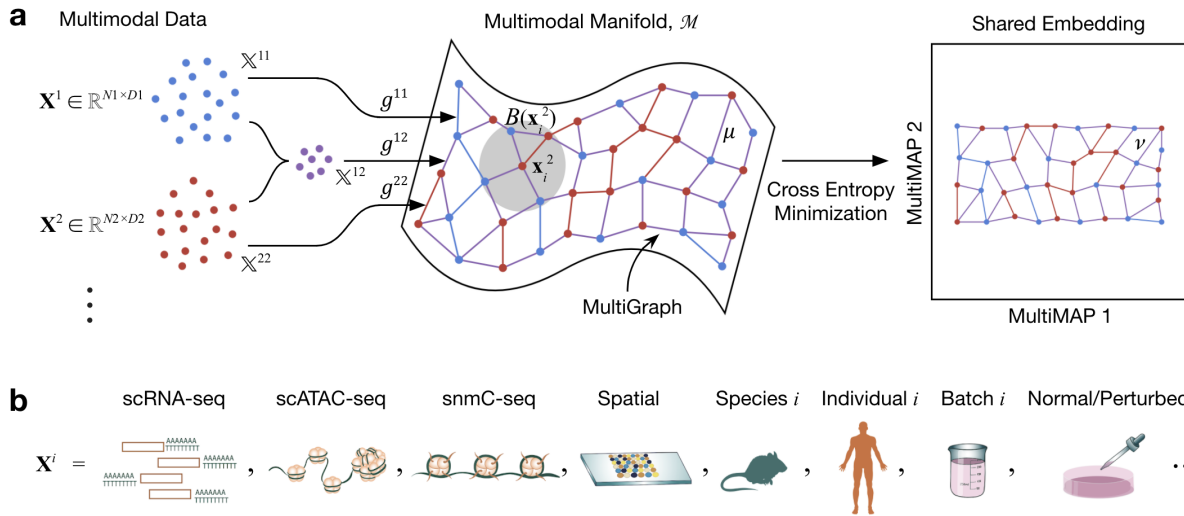

501

502

503

504

505

506

507

508

509

510

511

512

513

514

515

516

517

518

519

520

521

522

**Figure 1. Schematic of MultiMAP.** **a.** MultiMAP takes any number of datasets, including those of differing dimensions, recovers geodesic distances on a single latent manifold on which all data lie, constructs a neighborhood graph (MultiGraph) on the manifold, and then projects the data into a single low-dimensional embedding. Integrated analysis and visualisation can be performed on the embedding or graph. Variables are discussed in Methods.  $\mathbf{X}^i$  is dataset  $i$ ,  $\mathbf{x}_i^j$  is a point in  $\mathbf{X}^i$ ,  $M$  is the shared manifold,  $B(\mathbf{x}_i^2)$  is a ball on  $M$  centered at  $\mathbf{x}_i^2$ ,  $X^{ij}$  is the ambient space of  $M$  in the coordinate space with data containing points from datasets  $i$  and  $j$ ,  $g^{ij}$  is the metric of  $M$  in the space  $X^{ij}$ ,  $\mu$  is the membership function of the fuzzy simplicial set on the manifold,  $\nu$  is the membership function of the fuzzy simplicial set in the low-dimensional space. **b.** In the field of cell atlas technologies, encompassing single cell genomics and spatial technologies, MultiMAP can be applied to integrate across different omics modalities, species, individuals, batches, and normal/perturbed states.

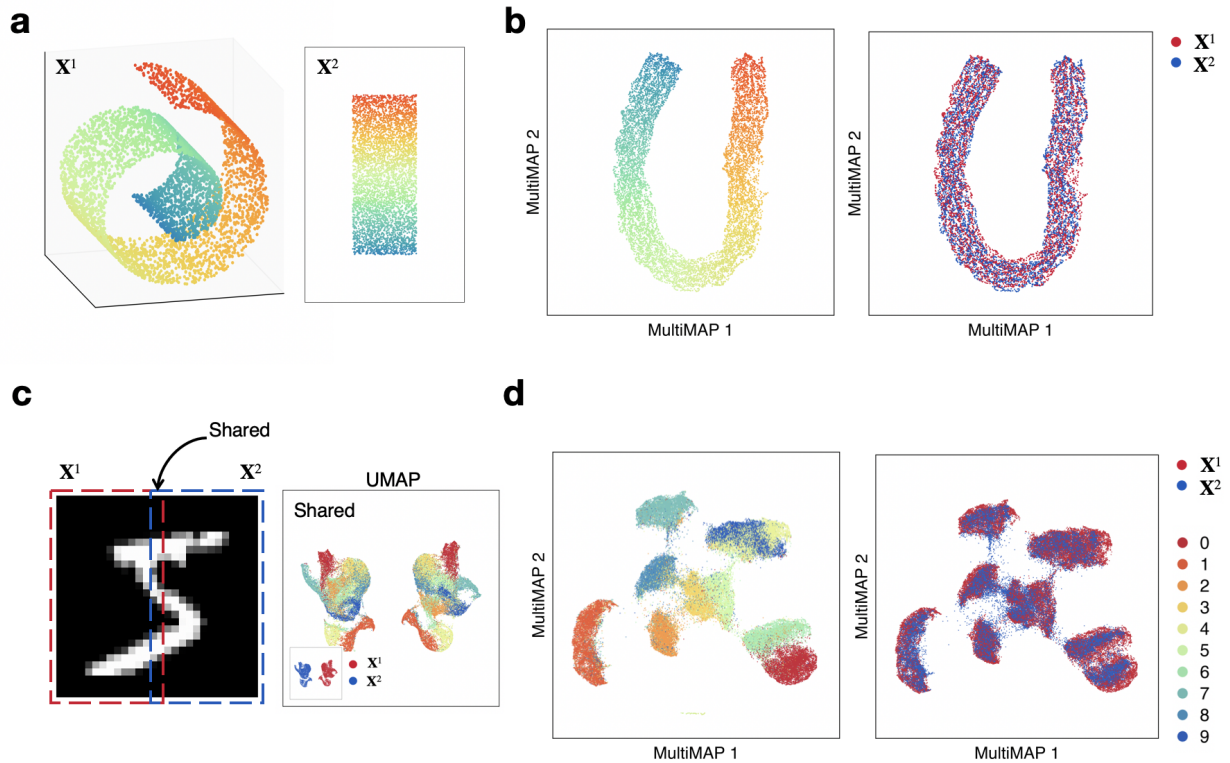

523  
524

525 **Figure 2. MultiMAP applied to synthetic data.** **a.** Data sampled from the 3D Swiss Roll ( $X^1$ )  
526 and a 2D rectangle ( $X^2$ ). **b.** Shared embedding of both datasets produced by MultiMAP. Color  
527 indicates position along the manifold (a,b). **c.** Left ( $X^1$ ) and right ( $X^2$ ) halves of MNIST  
528 handwritten digit images with a 2 pixel wide shared region. Gaussian noise is added to the left  
529 half. UMAP projections of each half and the shared region. **d.** Shared embedding of both MNIST  
530 halves (including Gaussian noise introduced for the left half) produced by MultiMAP. Each color  
531 is a different handwritten digit (0-9 as shown in the key). This illustrates that MultiMAP leverages  
532 both shared and unshared features to integrate multimodal datasets.

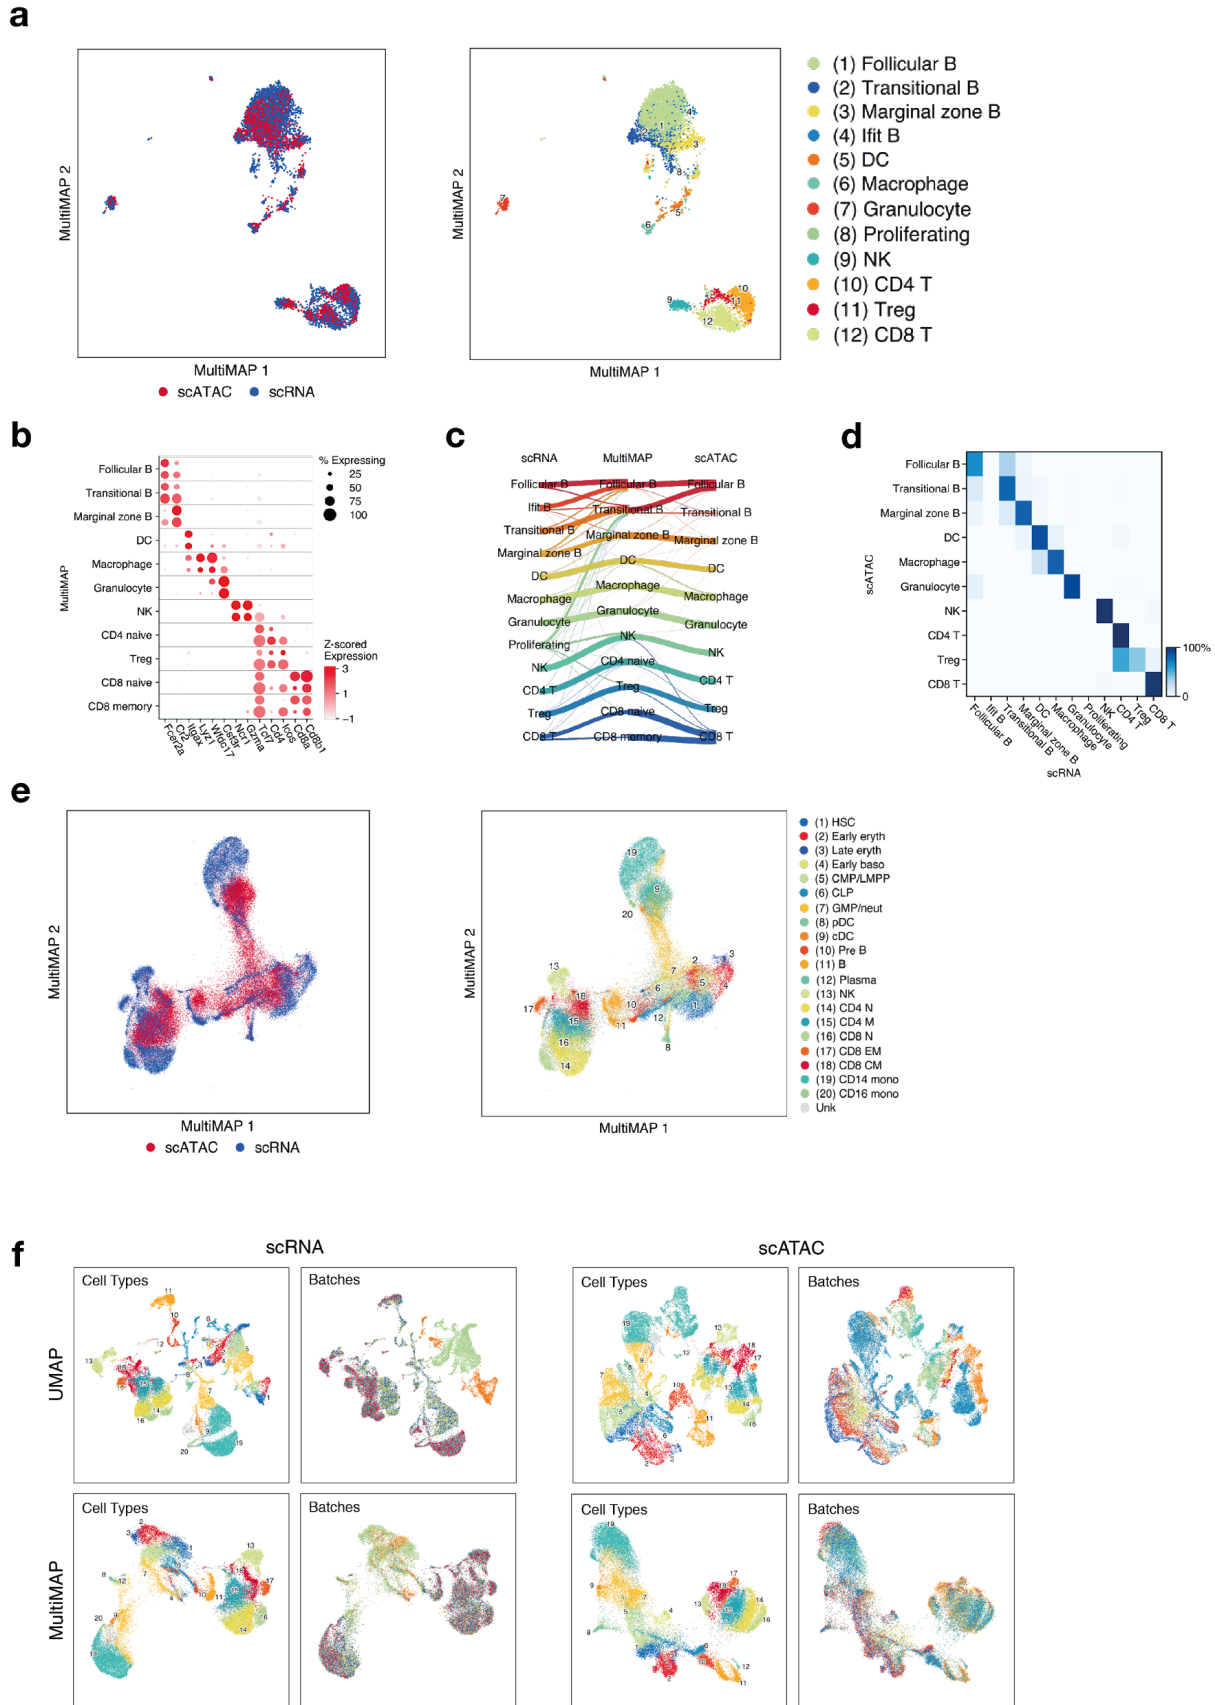

534 **Figure 3. MultiMAP integration of single-cell transcriptomics and chromatin accessibility.**  
535 **a.** MultiMAP visualization of the integration of published scATAC-seq<sup>15</sup> and newly generated  
536 scRNA-seq data of the mouse spleen (n=1), colored by omic technology (left hand panel) and  
537 independent cell type annotations of each omic technology (right hand panel). **b.** Dot plot  
538 showing the z-score of the mean log-normalised gene expression and gene activity scores of  
539 known markers of each identified joint cluster. The top dot of each row shows the cells from the  
540 scRNA-seq data, and the bottom dot represents the cells from the scATAC-seq data. **c.**  
541 Riverplot showing correspondence between the joint clusters and the independent annotations  
542 of the scATACseq and scRNAseq data. **d.** Confusion matrix of label transfer from the  
543 scRNAseq to the scATACseq. **e.** MultiMAP visualization of the integration of single-cell  
544 transcriptomics and chromatin accessibility of human bone marrow and peripheral blood  
545 mononuclear cells<sup>16</sup> colored by omic technology (left hand panel) and by the published cell type  
546 annotation (right hand panel). **f.** UMAP (panels in top row) and MultiMAP (panels in bottom row)  
547 visualization of the scRNA-seq and scATAC-seq data colored by cluster annotation and batch,  
548 showing the effective batch correction of both modalities using MultiMAP.  
549





552 **a.** MultiMAP visualization of scRNA-seq<sup>17</sup> (n=2) and spatial STARmap<sup>18</sup> (n=2) data of the  
553 mouse brain, colored by omic technology and joint clusters identified with the MultiGraph. **b.** Dot  
554 plot showing mean log-normalised gene expression of known markers of each identified joint  
555 cluster. The top dot in each row represents cells from the scRNA-seq data, and the bottom dot  
556 represents cells from the scATAC-seq data. **c.** Riverplot showing correspondence between the  
557 joint clusters, and the independent annotations of the scATACseq and scRNAseq data. **d.**  
558 Spatial locations of the STARmap cell, colored by the joint clusters. **e.** UMAP and MultiMAP  
559 visualizations of the STARmap dataset. The silhouette score as employed here quantifies the  
560 separation of clusters, and the higher value for MultiMAP shows the better cluster separation as  
561 compared to UMAP. **f.** MultiMAP visualization of the integration of single-cell transcriptomics,  
562 chromatin accessibility, and DNA methylation of the mouse primary cortex, colored by omic  
563 technology and the published cell type annotation<sup>20</sup>.  
564  
565

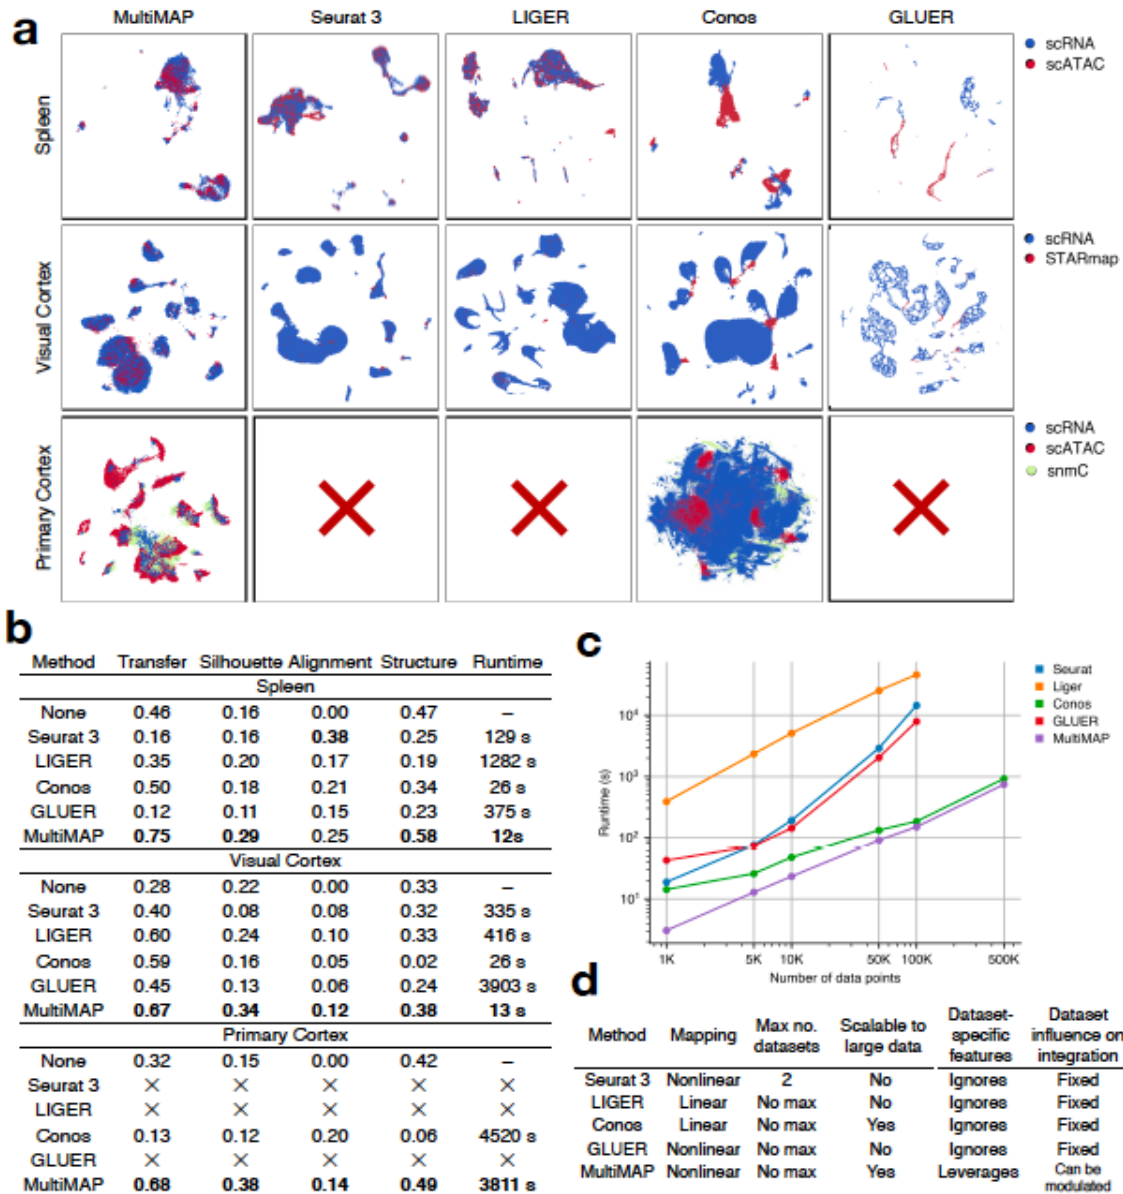

566

567 **Figure 5. Benchmarking MultiMAP against existing approaches.** a. Embeddings returned by

568 multi-omic integration methods on different datasets. “X” indicates that the method terminated

569 due to an out-of-memory error (218 GB RAM). b. Comparison of each method in terms of

570 transfer learning accuracy (“Transfer”), separation of cell type clusters as quantified by

571 Silhouette coefficient (“Silhouette”), mixing of different datasets as measured by fraction of

572 nearest neighbours that belong to a different dataset (“Alignment”), preservation of high-

573 dimensional structure as measured by the Pearson correlation between distances in the high-

574 and low-dimensional spaces (“Structure”), and runtime. c. Wall-clock time of multi-omic

575 integration methods on different sized datasets. Seurat 3 and LIGER produced out-of-memory

576 errors when run on 500,000 data points (218 GB RAM). To produce these datasets we

577 subsampled the mouse primary cortex scRNA-seq and scATAC-seq data<sup>20</sup> using geometric

578 sketching<sup>33</sup>. The datasets were subsampled so that there are equal number of cells in the

579 scRNA-seq and scATAC-seq data until 100,000 cells. Since the scATAC-seq data had 81,196  
580 cells in total, for the 500,000 cells comparison, we used an scRNA-seq of 418,804 cells. **d.**  
581 Comparison of capabilities and properties of each method. “Mapping” refers to the nature of the  
582 mapping employed by the method; “Max no. datasets” refers to the upper limit in terms of  
583 numbers of datasets accepted by the method; “Scalable to large data” refers to allowing a total  
584 of over 500,000 cells; “Data-set specific features” is whether the integration method allows  
585 information that is not shared across datasets; and “Dataset influence on integration” is whether  
586 the user can modulate the weighting of a given dataset relative to the others during the  
587 integration.

588

589

590

591

592

593

594

595

596

597

598

599

600

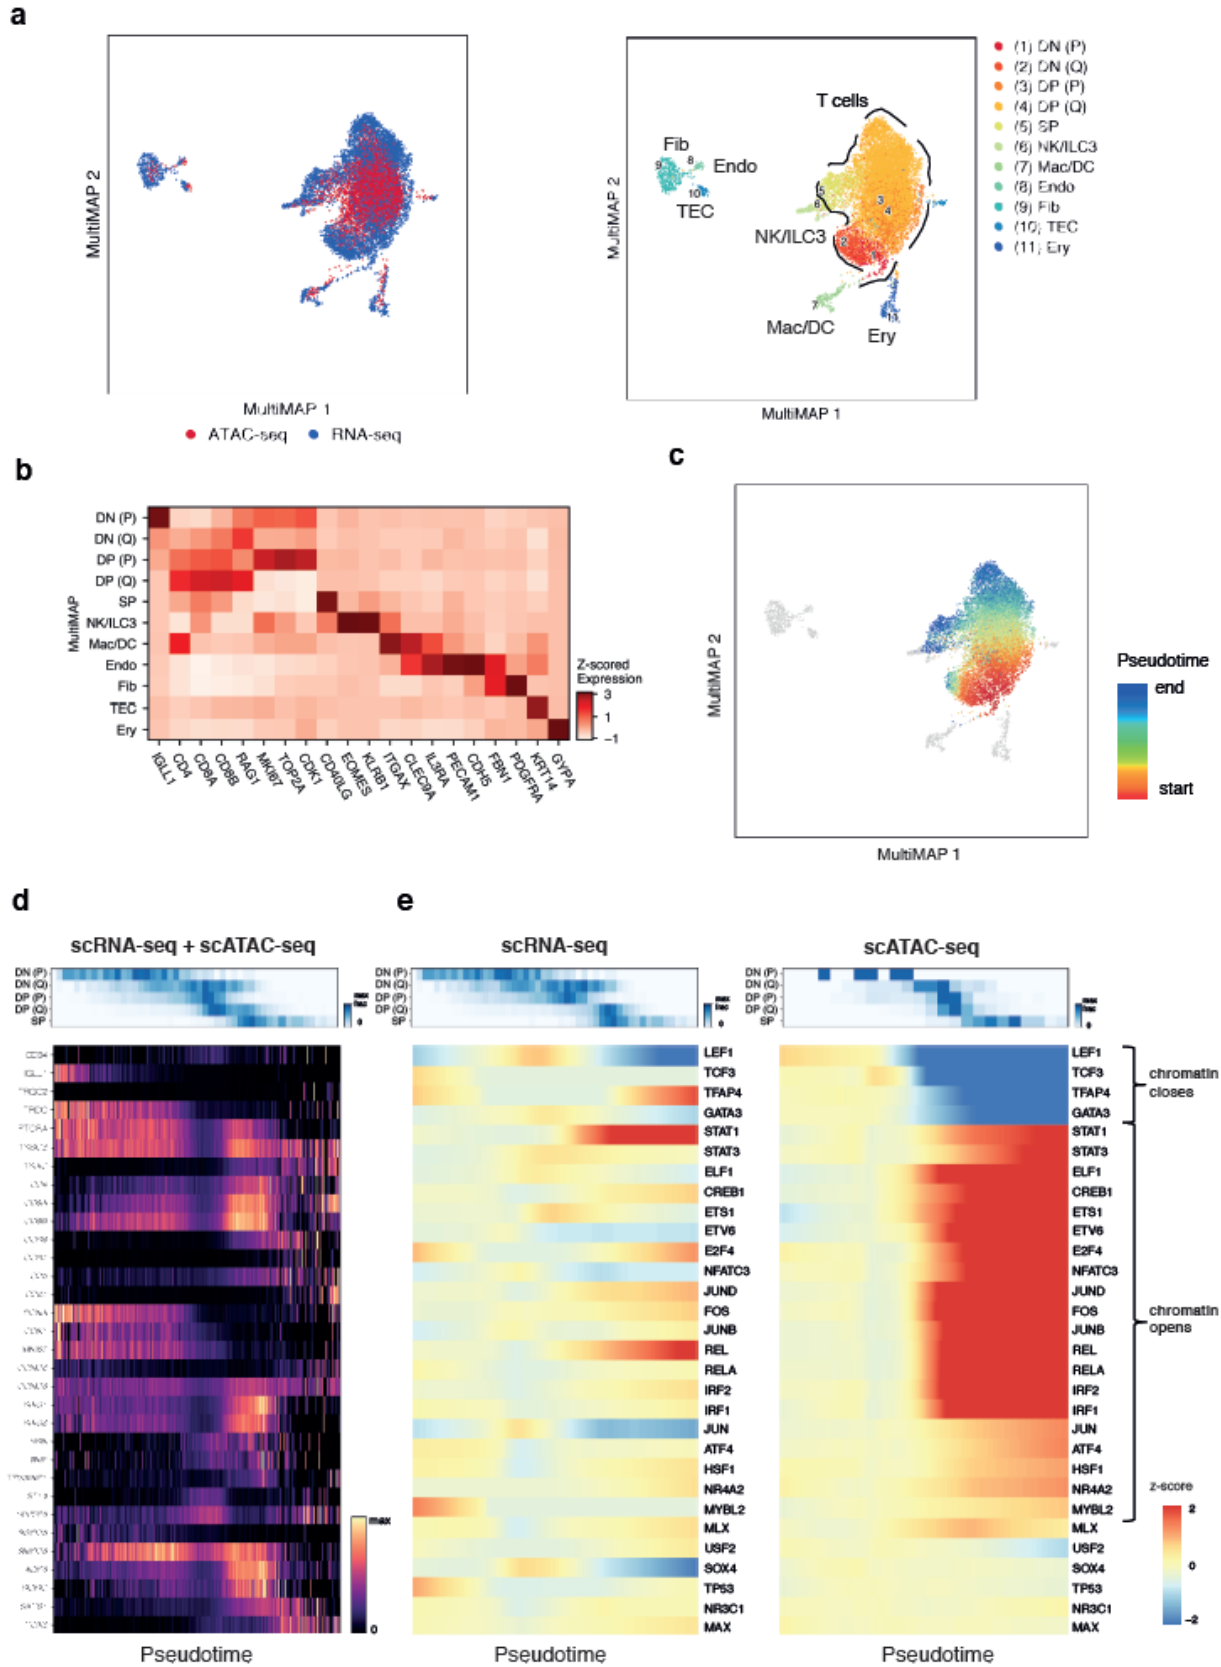

602  
603  
604  
605  
606  
607  
608  
609  
610  
611  
612  
613  
614  
615  
616  
617  
618  
619  
620  
621  
622  
623  
624  
625  
626  
627  
628  
629  
630  
631  
632  
633  
634  
635  
636  
637  
638  
639  
640  
641  
642  
643

**Figure 6. Integration of scRNAseq and scATACseq data of human fetal thymus reveals transcriptional regulatory principles of T cell development**

**a.** MultiMAP visualization of scRNA-seq and scATAC-seq datasets of the human fetal thymus (n=1), colored by modality and joint clusters identified using the MultiGraph. **b.** Heatmap of gene expression and gene activity scores of key markers of the joint clusters identified using the MultiGraph. **c.** Inferred pseudotime using the MultiGraph recovers the T cell differentiation trajectory. Color indicates pseudotime from red (early, beginning) to blue (late, end). **d.** Heatmap of the gene expression and gene activity scores over pseudotime of genes known to be involved in T cell development. **e.** Smoothed heatmaps of the z-score of the gene expression and motif accessibility of the most variable transcription factors over pseudotime. The motif accessibilities of TFs that varied most in time show changes in accessibility at the transition between the late DN and early DP stage of differentiation. This includes TFs such as GATA3, ZEB1 for which the chromatin at the binding sites closes at that transition, and TFs for which the chromatin at the binding sites opens, such as E2F4, ETS1 and others.



644

645 **Supplementary Figures**

646

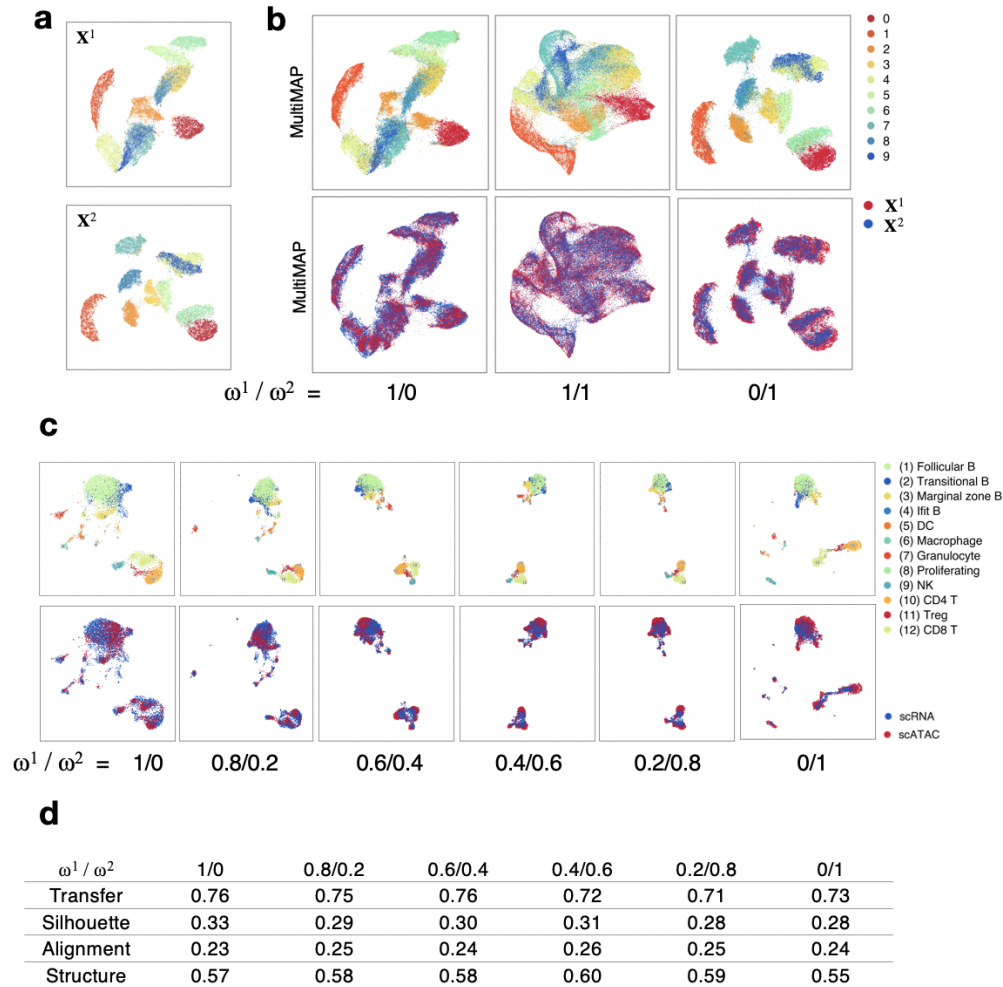

647

648

649 **Extended Data Figure 1. MultiMAP's weight parameter.** **a.** UMAP projections of the two halves  
 650 of the MNIST handwritten digit images. **b.** MultiMAP embeddings as the weight parameters are  
 651 varied. Each color is a different handwritten digit (0-9). When  $\omega^1$  is larger than  $\omega^2$ , the  
 652 embedding more closely resembles the projection of only  $X^1$ ; when  $\omega^2$  is larger than  $\omega^1$ , the  
 653 embedding more closely resembles the projection of only  $X^2$ . For different choices of  $\omega^v$ , the  
 654 datasets are well integrated in the embedding space. **c.** MultiMAP integration with varied weight  
 655 parameters of published scATAC-seq<sup>15</sup> and newly generated scRNA-seq data of the mouse  
 656 spleen ( $n=1$ ). **d.** Comparison of the MultiMAP integration of the spleen data as the weight  
 657 parameter is varied -- in terms of transfer learning accuracy ("Transfer"), separation of cell type  
 658 clusters as quantified by Silhouette coefficient ("Silhouette"), and preservation of high-

659 dimensional structure as measured by the Pearson correlation between distances in the high-  
 660 and low-dimensional spaces (“Structure”)

661  
 662  
 663

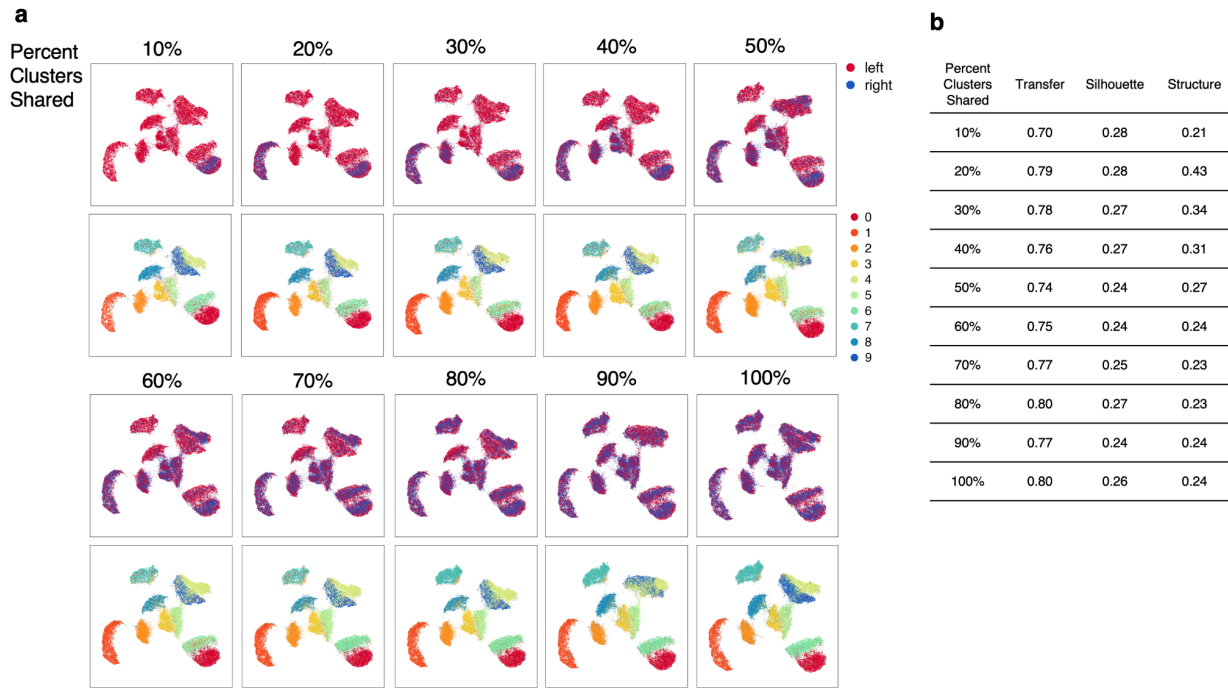

664

665 Extended Data Figure 2. **MultiMAP integration with non-shared clusters.** **a.** MultiMAP  
 666 integration of the left and right halves of MNIST handwritten digit images with a 2 pixel wide shared  
 667 region. Gaussian noise is added to the left half. MultiMAP integration is performed with a varying  
 668 number of digit clusters removed from the right dataset, so that the integration ranges from one  
 669 shared cluster (10%) to all clusters shared (100%). **b.** Comparison of the MultiMAP integration of  
 670 the modified MNIST dataset as the percent of clusters shared is varied -- in terms of transfer  
 671 learning accuracy (“Transfer”), separation of cell type clusters as quantified by Silhouette  
 672 coefficient (“Silhouette”), and preservation of high-dimensional structure as measured by the  
 673 Pearson correlation between distances in the high- and low-dimensional spaces (“Structure”).

674  
 675

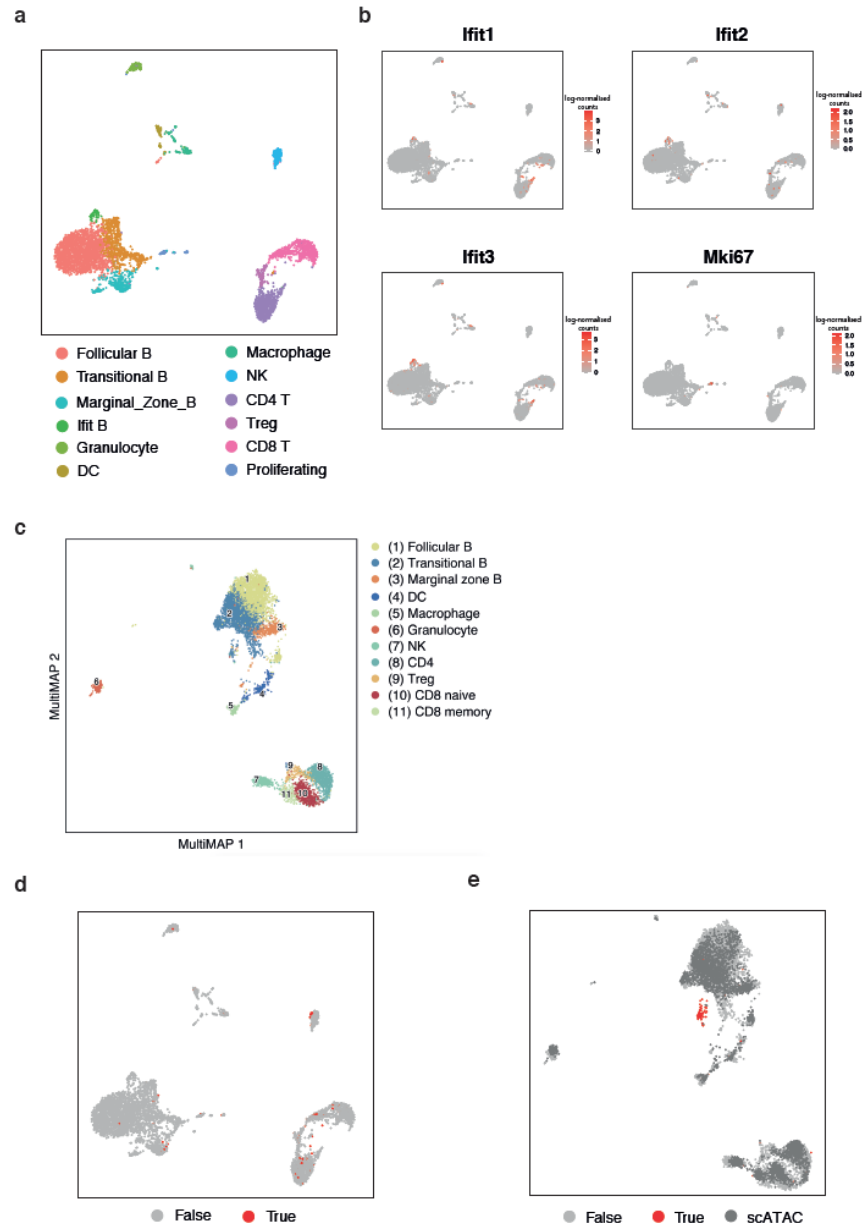

676  
 677 Extended Data Figure 3. **Mouse spleen scRNA-seq and scATAC-seq data.** **a.** UMAP  
 678 visualization of the mouse spleen scRNA-seq data (n=1) colored by the identified cell types. **b.**  
 679 UMAP visualisation of expression levels of Ifit family genes associated with interferon response,  
 680 upregulated in one specific B cell subpopulation, and the proliferation marker Mki67. **c.**  
 681 MultiMAP visualization of the integrated scRNA-seq and scATAC-seq mouse spleen data (n=1)  
 682 colored by the jointly identified clusters. **d, e.** UMAP (d) and MultiMAP (e) visualizations of the  
 683 mouse spleen data showing cells identified as doublets (labelled “True”) using an independent  
 684 pipeline (Scrublet). The MultiMAP visualisation leads to these artifactual data points being  
 685 clustered in one group, highlighting the power of this method to visualise and separate data.  
 686  
 687

688

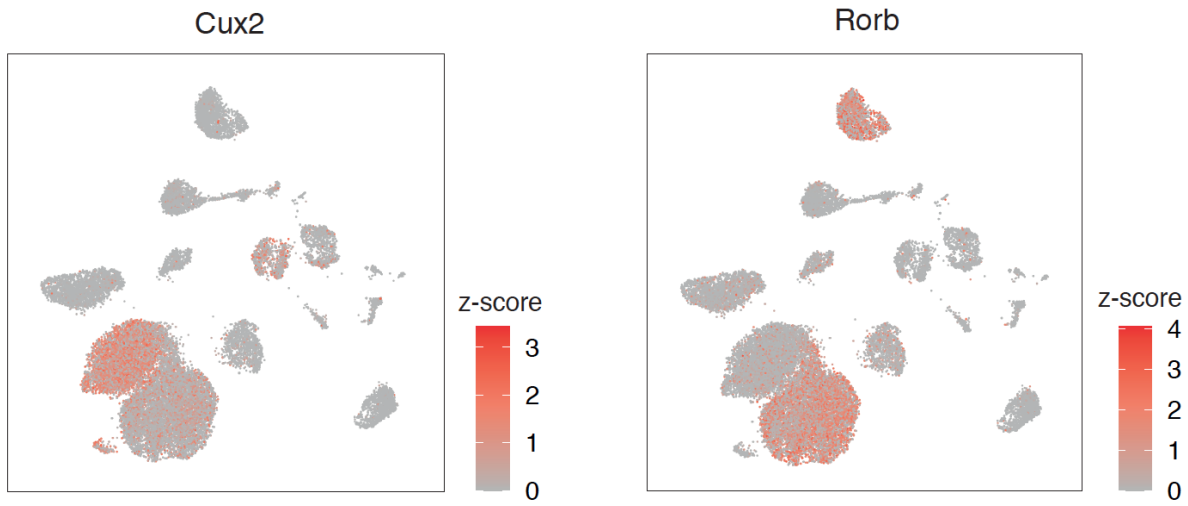

689

690

691

692

693

694

695

696

697

698

699

700

701

702

703

704

705

Extended Data Figure 4. **Marker genes of the L4 cluster identified in the scRNA-seq and STARmap integration.** MultiMAP visualisation of log-transformed gene expression of markers associated with L4 neurons. The MultiMAP integration identified L4 cells in the scRNA-seq data previously annotated as L5 neurons.

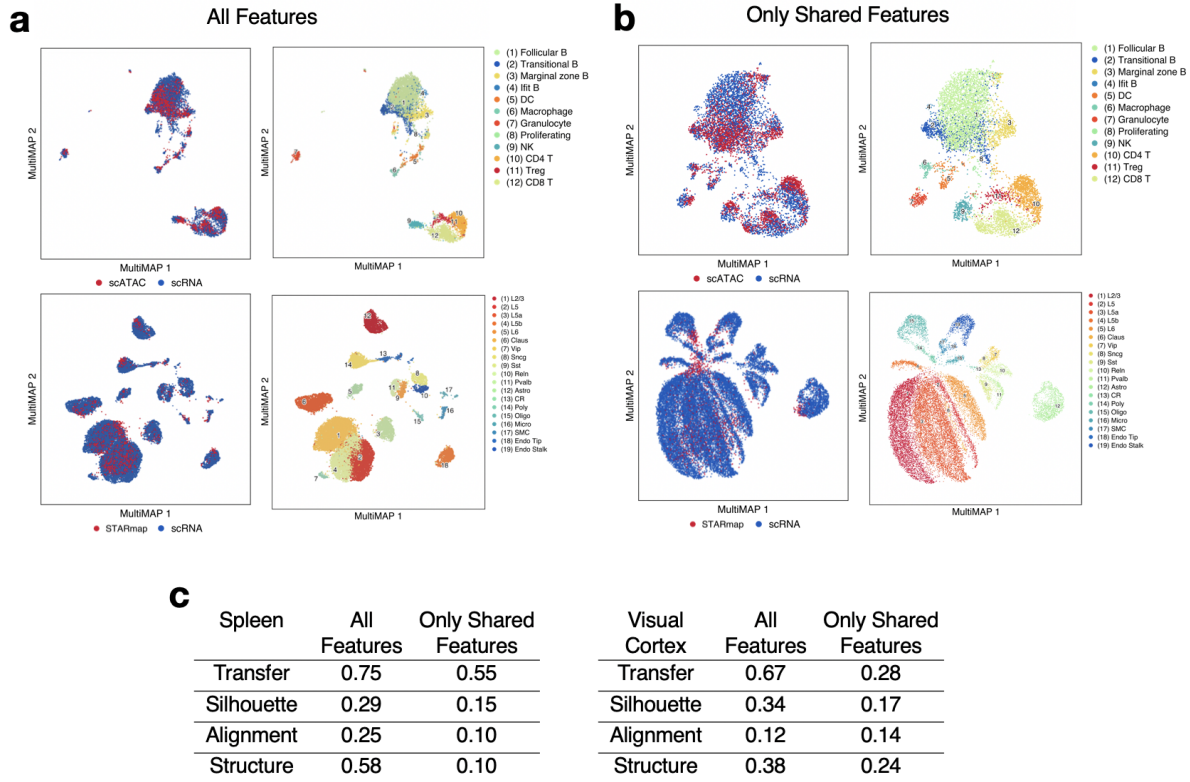

706  
707  
708  
709  
710  
711  
712  
713  
714  
715  
716  
717  
718  
719  
720

Extended Data Figure 5. **MultiMAP integration with all features vs. only shared features in the spleen scRNA-seq + scATACseq, and visual cortex STARmap + scRNAseq datasets.** **a.** MultiMAP embeddings using all genes present in each dataset (intended use of MultiMAP). **b.** MultiMAP embeddings using only genes shared by all datasets in each integration. **c.** Comparison of the MultiMAP integration with all features vs. only shared features -- in terms of transfer learning accuracy ("Transfer"), separation of cell type clusters as quantified by Silhouette coefficient ("Silhouette"), mixing of different datasets as measured by fraction of nearest neighbours that belong to a different dataset ("Alignment"), and preservation of high-dimensional structure as measured by the Pearson correlation between distances in the high- and low-dimensional spaces ("Structure").

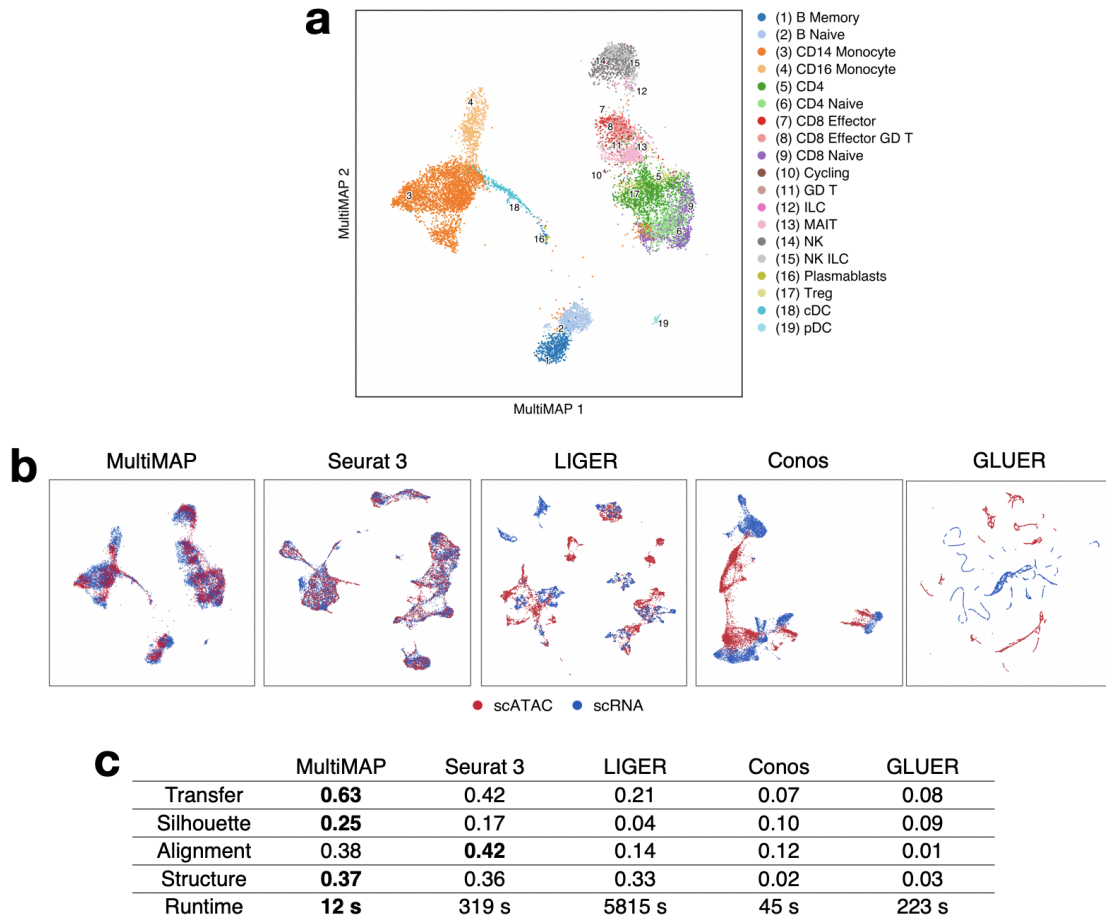

721  
722  
723  
724  
725  
726  
727  
728  
729  
730  
731  
732  
733  
734  
735  
736  
737  
738  
739  
740

Extended Data Figure 6. **Benchmarking MultiMAP using paired PBMCs.** **a.** MultiMAP visualization of the Multiome RNA+ATAC PBMCs, colored by independently annotated cell type. **b.** Embeddings produced by alternative integration strategies, colored by omic technology. **c.** Comparison of each method in terms of transfer learning accuracy (“Transfer”), separation of cell type clusters as quantified by Silhouette coefficient (“Silhouette”), mixing of different datasets as measured by fraction of nearest neighbours that belong to a different dataset (“Alignment”), preservation of high-dimensional structure as measured by the Pearson correlation between distances in the high- and low-dimensional spaces (“Structure”), and runtime.



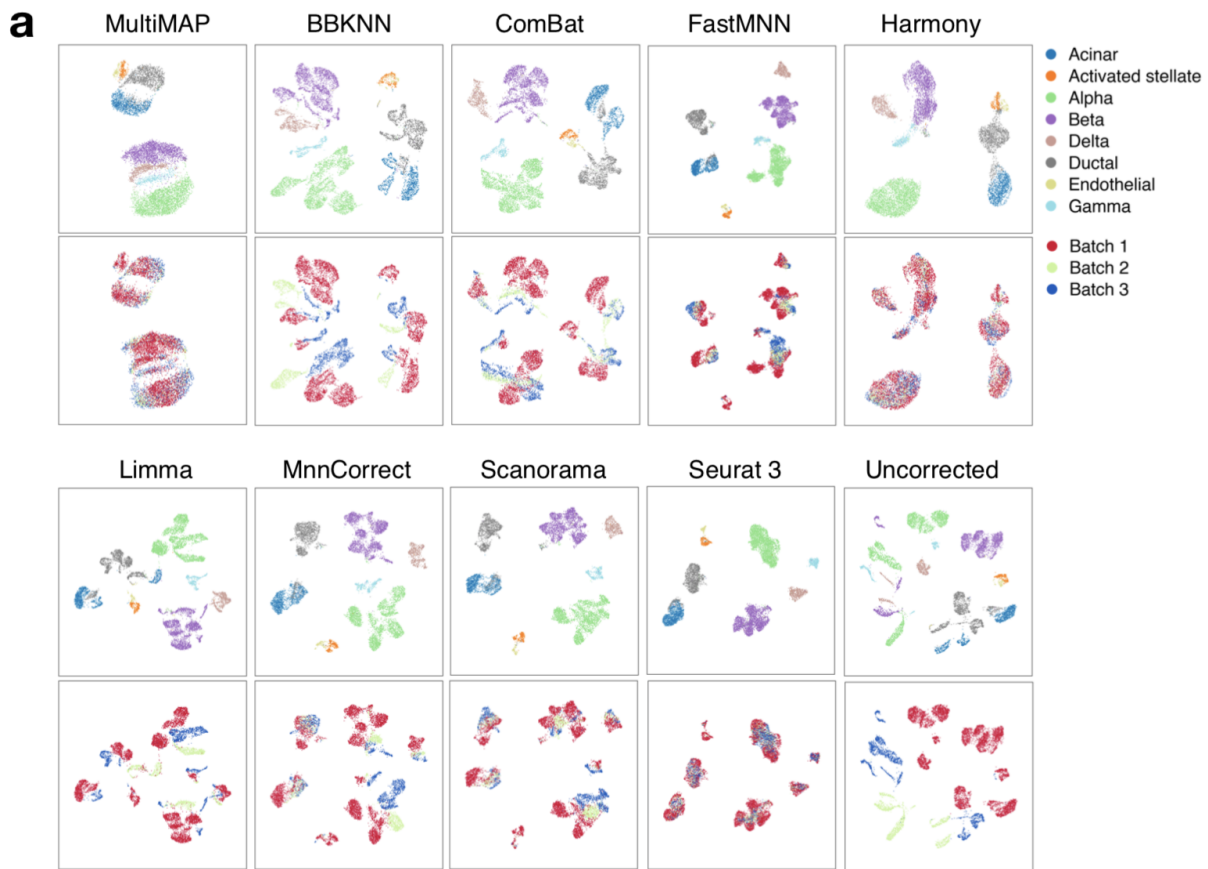

**b**

|            | MultiMAP | BBKNN | ComBat | FastMNN | Harmony |
|------------|----------|-------|--------|---------|---------|
| Silhouette | 0.26     | -0.27 | -0.24  | -0.24   | -0.16   |
| Alignment  | 0.29     | 0.01  | 0.09   | 0.17    | 0.28    |
| Structure  | 0.57     | 0.59  | 0.52   | 0.53    | 0.51    |

  

|            | Limma | MnnCorrect | Scanorama | Seurat 3 | Uncorrected |
|------------|-------|------------|-----------|----------|-------------|
| Silhouette | -0.24 | -0.21      | -0.23     | -0.23    | -0.31       |
| Alignment  | 0.02  | 0.08       | 0.12      | 0.30     | 0.00        |
| Structure  | 0.46  | 0.49       | 0.50      | 0.51     | 0.53        |

741  
 742 Extended Data Figure 7. **Benchmarking MultiMAP against batch correction methods.** **a.**  
 743 Embeddings returned by MultiMAP and batch correction methods on three scRNA-seq  
 744 pancreas datasets. **b.** Comparison of separation of cell type clusters as quantified by Silhouette  
 745 coefficient (“Silhouette”), mixing of different datasets as measured by fraction of nearest  
 746 neighbours that belong to a different dataset (“Alignment”), preservation of high-dimensional  
 747 structure as measured by the Pearson correlation between distances in the high- and low-  
 748 dimensional spaces (“Structure”), and runtime.

749  
 750  
 751  
 752

753

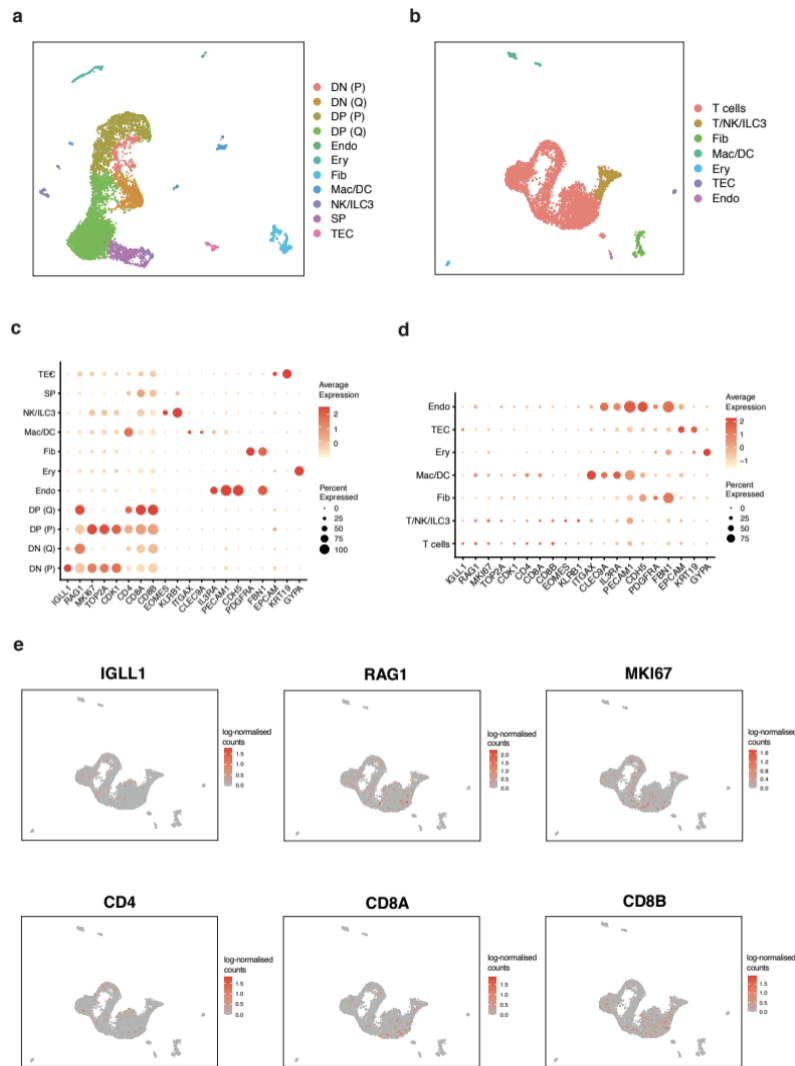

754

755

756

757 Extended Data Figure 8. **Fetal thymus scRNA-seq and scATAC-seq data.** **a.** UMAP

758 visualisation of the fetal thymus scRNA-seq data (n=1) colored by identified cell types shows the

759 same cell types as previously published<sup>31</sup>. **b.** UMAP visualisation of the fetal thymus scATAC-

760 seq data (n=1) colored by the identified cell types. **c.** Dot plot showing the z-score of the mean

761 log-transformed expression level of marker genes. **d.** Dot plot showing the z-score of the mean

762 log-transformed gene activity scores of marker genes, showing not very clear separation of T

763 cells clusters in the scATAC-seq data. **e.** UMAP visualisation of log-transformed gene activity

764 scores of markers for specific T cell subpopulations, showing that the scATAC-seq dataset does

765 not separate well the T cell clusters.

766

767

768

769

770

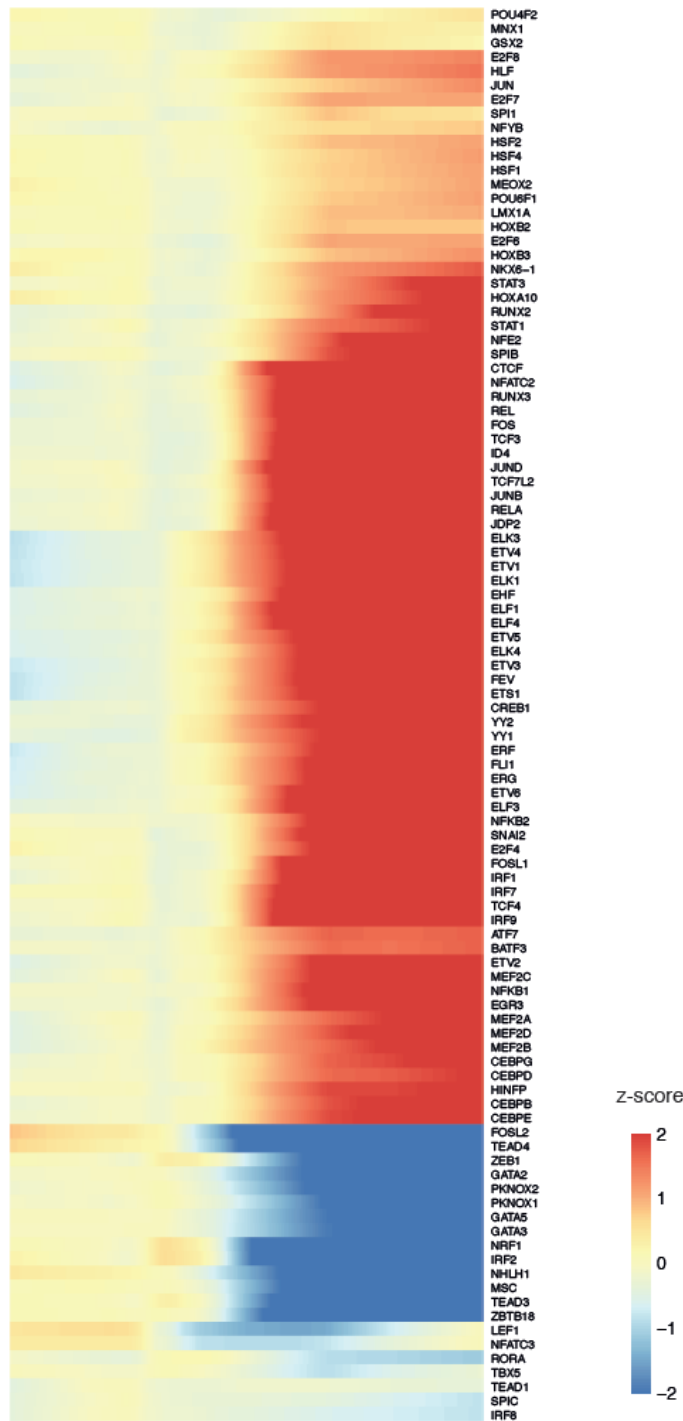

771

772 Extended Data Figure 9. **Chromatin accessibility of transcription factor binding sites.**

773 Smoothed heatmaps of the z-score of motif accessibility of the top 100 most variable transcription

774 factor binding sites over pseudotime. The TF binding sites that varied most in time show changes

775 in accessibility at the transition between the late DN and early DP stage of differentiation.

776

## 777 Methods

778

### 779 MultiMAP

780

781 MultiMAP (Figure 1) is a new approach for the integration and dimensionality reduction of  
782 multimodal data based on a framework of Riemannian geometry and algebraic topology.  
783 MultiMAP takes as input any number of datasets of potentially differing dimensions. The datasets  
784 take the form  $\mathbf{X}^i$ ,  $i = 1, 2, \dots$ , with  $\mathbf{x}_j^i \in \mathbb{R}^{D_i}$  being the  $j$ 'th point in dataset  $\mathbf{X}^i$ . MultiMAP recovers  
785 geodesic distances on a single latent manifold  $M$  on which all of the data is uniformly distributed.  
786 The geodesic distances are calculated between data points of the same dataset by normalizing  
787 distances in each dataset's ambient space  $X^{ii}$  with respect to a neighborhood distance specific to  
788 the dataset, and between data points of different datasets by normalizing distances between the  
789 data in a shared ambient space  $X^{ij}$  with respect to a neighborhood distance specific to the shared  
790 feature space. When integrating multi-omics data with MultiMAP, the ambient spaces are the PC  
791 components of each dataset's full feature space and of the shared feature space(s). These  
792 neighborhood distances are the radius of a constant-radius ball  $B$  on  $M$ . These distances are then  
793 used to construct a neighborhood graph (MultiGraph) on the manifold. Finally the data and  
794 manifold space are projected into a low-dimensional embedding space by minimizing the cross  
795 entropy of the graph in the embedding space with respect to the graph in the manifold space.  
796 Specifically, this optimization minimizes cross entropy of a fuzzy set–representation  $(\nu, \{\mathbf{x}_j^i\})$  of  
797 the graph in the embedding space with respect to a fuzzy set–representation  $(\mu, \{\mathbf{x}_j^i\})$  of the graph  
798 in the manifold space. MultiMAP allows the user to modify the weight  $\omega^i$  of each dataset in the  
799 cross entropy loss, allowing the user to modulate the contribution of each dataset to the layout.  
800 Integrated analysis can be performed on the embedding or the graph, and the embedding also  
801 provides an integrated visualization. An extended description of MultiMAP, including  
802 mathematical background, is in the Supplementary information.

803

### 804 Synthetic Data

805

806 MultiMAP was applied to two synthetic examples of multimodal data, in order to study the  
807 technique in a controlled setting.

808

809 The first synthetic setting is schematized in Figure 2a. This setting consists of one dataset ( $\mathbf{X}^1$ ) of  
810 10,000 points sampled randomly from the canonical 3D “Swiss roll” surface (generated with  
811 sklearn in Python), and a second dataset ( $\mathbf{X}^2$ ) of 10,000 points sampled randomly from a 2D  
812 rectangle. The two datasets can be considered multimodal data because they have different  
813 feature spaces but describe a similar rectangular manifold. In addition, we are given the position  
814 along the manifold of 1% of the data. Distances between data in the different datasets are  
815 calculated for 1% of the data as the absolute differences between these positions. These  
816 distances are supplied to MultiMAP. The purpose of this setting is to determine if MultiMAP can  
817 integrate data in a nonlinear fashion and operate on datasets of different dimensionality.

818

819 The second synthetic setting is schematized in Figure 2c. This setting consists of two datasets  
820 based on the MNIST database<sup>34</sup> which comprises 70,000 28x28 pixel grayscale images of  
821 handwritten digits 0-9. The first dataset ( $\mathbf{X}^1$ ) consists of the 28x15 pixel left half of each of images  
822 flattened into a 420 dimensional vector. The second dataset ( $\mathbf{X}^2$ ) consists of the 28x15 pixel right  
823 half of each of 70,000 digit images, also flattened into a 420 dimensional vector. Added to the first  
824 dataset is Gaussian noise with a mean of zero and a standard deviation equal to the maximum  
825 pixel value. The two halves overlap by a 28x2 pixel region. Distances between data in the different  
826 datasets are calculated in this shared space and supplied to MultiMAP. The two datasets can be  
827 considered multimodal because they have different feature spaces but describe a similar  
828 population of digit images. The purpose of this setting is to determine if MultiMAP can effectively  
829 leverage features unique to certain datasets. The thin overlapping region of the two halves is not  
830 enough information to create a good embedding of the data. Many distinct digits are similar in this  
831 thin central sliver, and hence they should cluster together in the feature space of the two pixel  
832 overlap. Indeed, in a UMAP projection of the data in the shared feature space of this overlap, the  
833 clusters of different digits are not as well separated as in the UMAP projections of each half  
834 (Figure 2c). A multimodal integration strategy that effectively leverages all features would use the  
835 features unique to each half to separate different digits, and the shared space to bring the same  
836 digits from each dataset close together.

837

### 838 **Acquisition and processing of human fetal thymic tissue**

839

840 The tissue sample used for this study was obtained with written informed consent from the  
841 participant in accordance with the guidelines in The Declaration of Helsinki 2000. The human fetal  
842 tissue was obtained from the MRC/Wellcome Trust-funded Human Developmental Biology  
843 Resource (HDBR, <http://www.hdbbr.org>) with appropriate maternal written consent and approval  
844 from the Newcastle and North Tyneside NHS Health Authority Joint Ethics Committee  
845 (08/H0906/21+5). HDBR is regulated by the UK Human Tissue Authority (HTA; [www.hta.gov.uk](http://www.hta.gov.uk))  
846 and operates in accordance with the relevant HTA Codes of Practice.

847

848 The developmental age was estimated from measurements of foot length and heel-to-knee  
849 length, and compared against a standard growth chart<sup>35</sup>. A piece of skin was collected from every  
850 sample for Quantitative Fluorescence-Polymerase Chain Reaction analysis using markers for the  
851 sex chromosomes and the following autosomes: 13, 15, 16, 18, 21, 22. The sample was of normal  
852 karyotype.

853

854 The tissue was processed immediately after isolation using enzymatic digestion. Tissue was  
855 transferred to a sterile 10mm<sup>2</sup> tissue culture dish and cut into <1mm<sup>3</sup> segments before being  
856 transferred to a 50mL conical tube. Tissues were digested with 1.6mg/mL collagenase type IV  
857 (Worthington) in RPMI (Sigma-Aldrich) supplemented with 10%(v/v) heat-inactivated fetal bovine  
858 serum (FBS; Gibco), 100U/mL penicillin (Sigma-Aldrich), 0.1mg/mL streptomycin (Sigma-  
859 Aldrich), and 2mM L-glutamine (Sigma-Aldrich) for 30 minutes at 37°C with intermittent shaking.  
860 Digested tissue was passed through a 100µm filter, and cells collected by centrifugation (500g for  
861 5 minutes at 4°C). Cells were treated with 1X red blood cells (RBC lysis buffer (eBioscience) for  
862 5 minutes at room temperature and washed once with a flow buffer (PBS containing 5%(v/v) FBS

863 and 2mM EDTA) prior to cell counting. For scATAC-seq, cells were taken forward for nuclei  
864 isolation following 10X Genomics guidelines. Briefly, cells were centrifuged (300g for 5 minutes),  
865 added the lysis buffer (Tris-HCl (pH 7.4) 10mM; NaCl 10Mm; MgCl<sub>2</sub> 3mM; Tween-20 0.1%; NP-  
866 40 0.1%; Digitonin 0.01%; BSA 1%) and incubated on ice for 3 minutes (time optimized for  
867 thymus). Following the incubation, cells were washed (Tris-HCl (pH 7.4) 10mM; NaCl 10Mm;  
868 MgCl<sub>2</sub> 3mM; BSA 1%; Tween-20 0.1%) and centrifuged (300g for 5 minutes) and nuclei were  
869 resuspended in Diluted Nuclei Buffer (10X Genomics). Isolated nuclei were high-quality with well-  
870 resolved edges and no evidence of blebbing. The final nuclei concentration was determined prior  
871 to loading using a hemocytometer.

872

### 873 **Single-cell RNA and ATAC sequencing of human thymus**

874

875 scRNA-seq targeting 5,000 cells per sample was performed using the Chromium Controller (10x  
876 Genomics). Single-cell cDNA synthesis, amplification, and sequencing libraries were generated  
877 using the Single Cell 5' Reagent Kit following the manufacturer's instructions. The libraries from  
878 up to eight loaded channels were multiplexed together and sequenced on an Illumina HiSeq 4000.

879

880 scATAC-seq targeting 5,000 cells was performed using Chromium Single Cell ATAC Library and  
881 Gel Bead kit (10x Genomics). The libraries from up to eight loaded channels were multiplexed  
882 together and sequenced on an Illumina HiSeq 4000.

883

### 884 **Computational processing and analysis of the human fetal thymus single cell genomics** 885 **data**

886

887 scRNA-seq data were aligned and quantified using the Cell Ranger Single-Cell Software Suite  
888 (version 2.0, 10x Genomics) against the GRCh38 human reference genome provided by Cell  
889 Ranger. The scRNA-seq data was preprocessed using Seurat 3. Cells with fewer than 500  
890 detected genes and more than 10% mitochondrial gene expression content were removed.  
891 Ribosomal genes, cell cycle genes<sup>31</sup> and genes associated with dissociation-induced effects<sup>36</sup>  
892 were removed. Clusters were identified using a community identification algorithm as  
893 implemented in the Seurat 'FindClusters' function, using 30 principal components (PCs) and  
894 annotated using canonical cell-type markers from<sup>31</sup>.

895

896 The scATAC-seq data was aligned and preprocessed using CellRanger (10x Genomics).  
897 SnapATAC<sup>37</sup> was used for quality control, preprocessing, and generating cell-by-bin and log-  
898 normalized gene activity matrices. The binarized cell-by-bin matrix was used as input for term  
899 frequency-inverse document frequency (TF-IDF) weighting, using term frequency and smoothed  
900 inverse document frequency as the weighting scheme. Weighted data were reduced to 30  
901 dimensions using singular-value decomposition (SVD). Clustering and UMAP visualization were  
902 performed using Seurat 3. chromVar<sup>38</sup> was used to discover transcription factor dynamics and  
903 variation in their motif accessibility.

904

905 The 50 dimension reduced scATAC-seq and the 50 dimension reduced scRNA-seq data were  
906 supplied as input to MultiMAP. A shared feature space with both the scATAC-seq and scRNA-



907 seq was constructed by removing genes from each dataset that were not present in the other,  
908 and then reducing the space to 50 dimensions using PCA. This shared space was supplied as  
909 input to MultiMAP, allowing the calculation of distances between cells from different datasets. The  
910 parameters of MultiMAP were all set to their default values, including the weight parameter for  
911 the scRNA-seq set to 0.8 and for ATAC-seq set to 0.2, on account of the higher-quality scRNA-  
912 seq.

913  
914 The Leiden algorithm<sup>39</sup> was applied directly to the MultiGraph to jointly cluster all cells. The  
915 clusters were then annotated using canonical cell-type markers from <sup>31</sup>. Diffusion pseudotime  
916 (DPT)<sup>40</sup> was used for trajectory inference. The MultiGraph was supplied as input to the DPT  
917 function in SCANPY<sup>41</sup>. DPT was performed only on cells annotated as T cells. Cells were removed  
918 if they were positioned away from T cell clusters and close to Fibroblasts and Erythrocytes on the  
919 MultiMAP plot, as this likely indicated that they were incorrectly annotated. tradeSeq<sup>42</sup> was used  
920 to identify genes whose expression changes significantly along the trajectory.

921

## 922 **Acquisition and processing of human PBMCs**

923

924 PBMCs from two donors were acquired from a LeukoLab (Clinical division of AllCells). Frozen  
925 PBMC samples were thawed quickly at 37 °C in a water bath. Two pools made for technical  
926 duplicates with ~500,000 cells for each donor per pool (50/50). Nuclei isolation, transposition,  
927 ATAC-seq and Gene Expression (GEX) sequencing libraries construction performed according  
928 to the manufacturer's Demonstrated protocol (CG000365 Rev A; 10X Genomics) and Next GEM  
929 Single Cell Multiome ATAC and Gene Expression user guide (CG000338 Rev A; 10X Genomics).  
930 One lane per pool with a 3,000 targeted nuclei recovery was loaded on a Chromium Next GEM  
931 Chip J. ATAC-seq and GEX indexed libraries were sequenced on a NovaSeq 6000 SP Flowcell  
932 according to the 10X Genomics recommendations, aiming for a minimum of 50,000 PE reads per  
933 cell for both types (ATAC-Seq and GEX) libraries.

934

## 935 **Computational processing and analysis of the human PBMCs Multiome ATAC+RNA data**

936

937 snRNA-seq and snATAC-seq data were aligned and quantified using the Cell Ranger ARC suite  
938 (10x Genomics) against the GRCh38 human reference genome provided by Cell Ranger. The  
939 snRNA-seq data was preprocessed using Seurat 3. Cells with fewer than 500 detected genes  
940 and more than 20% mitochondrial gene expression content were removed. Clusters were  
941 identified using a community identification algorithm as implemented in the Seurat 'FindClusters'  
942 function, using 30 principal components (PCs) and annotated using canonical cell-type markers.

943

944 SnapATAC<sup>37</sup> was used for quality control, preprocessing, and generating cell-by-bin and log-  
945 normalized gene activity matrices for the snATAC-seq data. The binarized cell-by-bin matrix was  
946 used as input for term frequency-inverse document frequency (TF-IDF) weighting, using term  
947 frequency and smoothed inverse document frequency as the weighting scheme. Weighted data  
948 were reduced to 30 dimensions using singular-value decomposition (SVD). Clustering and UMAP  
949 visualization were performed using Seurat 3. We used the

950

951 The 50 dimension reduced snATAC-seq and the 50 dimension reduced snRNA-seq data were  
952 supplied as input to MultiMAP. A shared feature space with both the snATAC-seq and snRNA-  
953 seq was constructed by removing genes from each dataset that were not present in the other,  
954 and then reducing the space to 50 dimensions using PCA. This shared space was supplied as  
955 input to MultiMAP, allowing the calculation of distances between cells from different datasets. The  
956 parameters of MultiMAP were all set to their default values, including the weight parameter for  
957 the snRNA-seq set to 0.8 and for snATAC-seq set to 0.2, on account of the higher-quality snRNA-  
958 seq.

959  
960

961

### 962 **Single-cell RNA sequencing of mouse spleen and data processing**

963

964 The mice were maintained under specific pathogen-free conditions at the Wellcome Trust  
965 Genome Campus Research Support Facility (Cambridge, UK). These animal facilities are  
966 approved by and registered with the UK Home Office. All procedures were in accordance with the  
967 Animals (Scientific Procedures) Act 1986. The protocols were approved by the Animal Welfare  
968 and Ethical Review Body of the Wellcome Trust Genome Campus.

969 The spleen from a 6-month-old C57BL/6Jax mouse was removed. The splenocytes were isolated  
970 by passing the spleen through a 70 µm cell strainer (Fisher Scientific 10788201) into 30 ml ice-  
971 cold 1X DPBS (Thermo Fisher 14190169) with 2 mM EDTA and 0.5% (w/v) BSA (Sigma A9418)  
972 using the plunger of a 2-ml syringe. Cells were spun down at 500 g for 7 minutes at 4 degree.  
973 Then the supernatant was removed, and the cell pellet resuspended in 5 ml 1X RBC lysis buffer  
974 (Thermo Fisher 00-4300-54). The cell suspension was vigorously vortexed for 5 seconds and left  
975 on the bench for 5 minutes to lyse the red blood cells. Then 45 ml ice-cold 1X DPBS was added,  
976 and cells were spun down at 500 g for 7 minutes at 4 degrees. The supernatant was removed,  
977 and 30 ml ice-cold 1X DPBS with 0.1% BSA was used to resuspend the cell pellet. The cell  
978 suspension was passed through a Miltenyi 30 µm Pre-Separation Filter (Miltenyi 130-041-407),  
979 and the cell number was determined using the C-chip counting chamber (VWR DHC-N01). The  
980 cells were spun down again, and the cell pellet resuspended in ice-cold 1X DPBS with 0.1% BSA  
981 to reach a concentration of 1,000,000 cells per ml. The splenocytes were then loaded on the 10x  
982 Chromium Controller, aiming to recover ~ 5000 cells (Targeted Cell Recovery 5000 cells). cDNA  
983 and a sequencing library were made according to 10x Single Cell 3' Reagent Kits v2 manual. The  
984 library was sequenced on an Illumina HiSeq 4000 machine.

985 The resulting scRNA-seq data were preprocessed using CellRanger (10x Genomics) and  
986 downstream analysis were performed using the Seurat 3 workflow. Cells with fewer than 200  
987 detected genes and more than 10% mitochondrial gene expression content were filtered out.  
988 Downstream analyses such as normalization, clustering and visualization were performed using  
989 Seurat 3. Clusters were identified using the community identification algorithm as implemented in  
990 the Seurat 'FindClusters' function, using 20 PCs. Clusters were annotated using canonical cell-  
991 type markers from the original study<sup>15</sup>. Scrublet<sup>43</sup> was used for doublet detection.

992

## 993 **Acquisition and processing of previously published datasets**

994

995 The mouse spleen scATAC-seq data was obtained from ArrayExpress (E-MTAB-6714) and  
996 preprocessed using the code provided by Chen et al. <sup>15</sup>([https://github.com/dbrg77/plate\\_scATAC-](https://github.com/dbrg77/plate_scATAC-seq)  
997 [seq](https://github.com/dbrg77/plate_scATAC-seq)). Briefly, reads from all cells were merged, and open chromatin regions were identified by  
998 peak calling with MACS2 <sup>44</sup>. Latent semantic indexing analysis was used for dimensionality  
999 reduction of the resulting cell-by-bin matrix. The binary cell-by-bin accessibility was used as input  
1000 for TF-IDF weighting, using term frequency and smoothed inverse document frequency as the  
1001 weighting scheme. Weighted data were reduced to 50 dimensions using SVD. SnapATAC<sup>37</sup> was  
1002 used to generate gene activity count matrices, which were then log-normalized. The 50 dimension  
1003 reduced accessibility of the scATAC-seq and the 50 dimension reduced gene expression of the  
1004 scRNA-seq data were supplied as input to MultiMAP. The 50-dimension reduced accessibility of  
1005 the scATAC-seq and the 50-dimension reduced gene expression of the scRNA-seq data were  
1006 supplied as input to MultiMAP. A shared feature space with both the scATAC-seq and scRNA-  
1007 seq was constructed by removing genes from each dataset that were not present in the other,  
1008 and then reducing the space to 50 dimensions using PCA. This shared space was supplied as  
1009 input to MultiMAP, allowing the calculation of distances between cells from different datasets. The  
1010 parameters of MultiMAP were all set to their default values, including the weight parameter for  
1011 the scRNA-seq set to 0.8 and for ATAC-seq set to 0.2 due to the higher quality scRNA-seq.  
1012 The Leiden algorithm was applied directly to the MultiGraph to jointly cluster all cells. Harmonic  
1013 function-based node classification was performed directly on the MultiGraph to predict cell types  
1014 of the scATAC-seq cells given the cell types of the scRNA-seq cells<sup>45</sup>.

1015

1016 Human hematopoiesis scRNA-seq and scATAC-seq data were downloaded from  
1017 <https://github.com/GreenleafLab/MPAL-Single-Cell-2019>. The scRNA-seq consists of 6  
1018 experimental batches, and the scATAC-seq consists of 10 experimental batches. Severe batch  
1019 effects were observed, so this data was considered to consist of 16 separate datasets for the  
1020 integration with MultiMAP. The scRNA-seq data was preprocessed using Seurat 3, and each  
1021 batch was log-normalized and reduced to 50 dimensions with PCA. The cell-by-bin peak  
1022 accessibility was used as provided by the authors. The binary cell-by-bin accessibility was used  
1023 as input for TF-IDF weighting, using term frequency and smoothed inverse document frequency  
1024 as the weighting scheme. Separately for each batch, the weighted data were reduced to 50  
1025 dimensions using SVD. Gene activities of the ATAC data were calculated using Cicero<sup>46</sup> and log-  
1026 normalized. To integrate all of the data at once, all 16 datasets were provided as input to MultiMAP  
1027 in the form of the 50 dimension reduced accessibility data of the scATAC-seq and the 50  
1028 dimension reduced gene expression of the scRNA-seq. Shared feature spaces containing two  
1029 datasets were constructed by removing genes from each of the datasets that were not present in  
1030 the other, and then reducing the space to 50 dimensions using PCA. These shared spaces were  
1031 supplied as input to MultiMAP to calculate distances between cells from different datasets. The  
1032 parameters of MultiMAP were all set to their default values, including the weight parameter for  
1033 the scRNA-seq set to 0.8 and for ATAC-seq set to 0.2 due to the higher-quality scRNA-seq data.

1034

1035 scRNA-seq data of the mouse frontal cortex acquired with Drop-seq was obtained from  
1036 dropviz.org. STARmap data of the mouse visual cortex was downloaded from  
1037 <https://www.starmapresources.com/data/>. Each dataset was separately preprocessed with  
1038 Seurat 3<sup>11</sup>, log-normalized, and reduced to 50 dimensions with PCA. Both 50 dimensional  
1039 reduced datasets were supplied as input to MultiMAP. A shared feature space with both the  
1040 STARmap and scRNA-seq data was constructed by removing genes from each dataset that were  
1041 not present in the other, and then reducing the space to 50 dimensions using PCA. This shared  
1042 space was supplied as input to MultiMAP to calculate distances between cells from different  
1043 datasets. The parameters of MultiMAP were all set to their default values, including the weight  
1044 parameter for the scRNA-seq set to 0.8 and for Drop-seq set to 0.2, on account of higher-quality,  
1045 tighter clusters generally observed in the scRNA-seq.

1046  
1047 scRNA-seq, scATAC-seq, and snmC-seq data from the mouse primary cortex<sup>20</sup> was downloaded  
1048 from the Neuroscience Multi-omics Archive (NeMO). The scRNA-seq was preprocessed using  
1049 Seurat 3, log-normalised, and reduced to 50 dimensions with PCA. The binary cell-by-bin  
1050 accessibility and gene activity count matrix of the scATAC-seq were obtained with SnapATAC<sup>37</sup>.  
1051 The gene activity count data was log-normalized. Latent semantic indexing analysis was used for  
1052 dimensionality reduction of the scATAC-seq accessibility. The binary cell-by-bin accessibility was  
1053 used as input for TF-IDF weighting, using term frequency and smoothed inverse document  
1054 frequency as weighting scheme. Weighted data were reduced to 50 dimensions using SVD. The  
1055 DNA methylation data was preprocessed as described in <sup>47</sup>, using the provided scripts. Briefly,  
1056 after mapping, the methyl-cytosine counts and total cytosine counts were calculated in two sets  
1057 of genome regions for each cell: the non-overlapping 100 kb bins tiling the mm10 genome, which  
1058 was used for dimensionality reduction, and gene body regions  $\pm 2$  kb, which is used for the joint  
1059 alignment. Posterior mCH and mCG rates were calculated based on beta-binomial distribution for  
1060 the non-overlapping 100kb bins matrix. The top 3000 highly variable features were taken and the  
1061 data was reduced to 50 dimensions with PCA. Because gene body mCH proportions are  
1062 negatively correlated with gene expression level, the direction of the methylation data was  
1063 reversed by subtracting all values from the maximum methylation value<sup>12</sup>. The 50 dimensional  
1064 reduced scRNA-seq, scATAC-seq, and snmC-seq were supplied as input to MultiMAP. Shared  
1065 feature spaces containing each pair of two datasets and all three datasets together were  
1066 constructed by removing genes from each of the datasets that were not present in the other, and  
1067 then reducing the space to 50 dimensions using PCA. These shared spaces were supplied as  
1068 input to MultiMAP, allowing the calculation of distances between cells from different datasets. The  
1069 parameters of MultiMAP were all set to their default values. The weight parameter for the scRNA-  
1070 seq set to 0.8 and for the other omics set to 0.2, on account of the higher-quality scRNA-seq data.

## 1071 **Benchmarking**

1072  
1073  
1074 Benchmarking of MultiMAP, Seurat 3, LIGER, Conos and GLUER was performed using a variety  
1075 of multi-omic data including the scRNA-seq and scATAC-seq data of the spleen, scRNA-seq and  
1076 STARmap of the visual cortex, and the scRNA-seq, scATAC-seq, and snmC-seq of the primary  
1077 cortex. These datasets were chosen because they all have cell type annotations supplied in their  
1078 original publications, which was used to independently validate the integration.

1079

1080 The scRNA-seq and STARmap data was log-normalised using Seurat 3 and then used as an  
1081 input for all integration methods, except GLUER where the raw data was used as an input and  
1082 preprocessed using the SCANPY workflow. The scATAC-seq data was preprocessed as  
1083 described above and the log-normalised gene activity matrix was used as an input for all  
1084 integration methods. Seurat 3, LIGER, Conos and GLUER were executed as detailed in their  
1085 tutorials, with all parameters set to their default values. Latent Semantic Indexing was used as  
1086 the dimensionality reduction technique for the scATAC-seq data for weighting anchors in Seurat  
1087 3. CCA was used as the dimensionality reduction technique for the scRNA-seq and STARmap  
1088 data for weighting anchors in Seurat 3.

1089

1090 A diversity of performance metrics was used. After integration, label transfer of the cell type  
1091 annotations from the scRNA-seq to each other omic was performed by setting the cell type of a  
1092 query cell to the most frequent type among its 5 nearest labeled neighbors. The balanced  
1093 accuracy of the label transfer (“Transfer”) was calculated using the annotations from the original  
1094 publications as the ground truth. A high accuracy indicates that the same cell types from different  
1095 modalities are near each other in the integrated embedding. After integration, the average  
1096 Silhouette score<sup>48</sup> (“Silhouette”) across all cells was calculated using the cell type annotations  
1097 from the original publications as the cluster labels. We note that the Silhouette score is not  
1098 affected by the number of clusters as we use the same cell type labels, and hence number of  
1099 clusters, for each integration method. A higher Silhouette score indicates the embedding is better  
1100 separating distinct cell types. The degree of alignment (“Alignment”) of the different datasets in  
1101 the integrated embedding was calculated as the proportion of each cell's 5 nearest neighbors that  
1102 originated in a different dataset, averaged over all cells. This metric was also used in <sup>12</sup>. A higher  
1103 value of the alignment score indicates that the different datasets are more evenly mixed in the  
1104 integrated embedding. The degree to which the embedding preserves the high-dimensional  
1105 structure (“Structure”) of each dataset was calculated as the Pearson correlation between all  
1106 pairwise distances in the high-dimensional spaces and the corresponding distances in the  
1107 embedding. A higher correlation indicates that the embedding is more faithful to the high-  
1108 dimensional structure. All of these performance metrics were also calculated in the shared feature  
1109 space of the datasets to be integrated, to get baseline values of the metrics prior to the application  
1110 of any integration strategy.

1111

1112 The wall-clock runtime of each method on each dataset was recorded. Additionally, to  
1113 characterize the runtimes of the methods on a wide range of dataset sizes, the integration  
1114 methods were run on datasets ranging from 1,000 to 500,000 cells. To produce these datasets  
1115 we subsampled the mouse primary cortex scRNA-seq and scATAC-seq data<sup>20</sup> using geometric  
1116 sketching<sup>33</sup>. The datasets were subsampled so that there are equal number of cells in the scRNA-  
1117 seq and scATAC-seq data until 100,000 cells. Since the scATAC-seq data had 81,196 cells in  
1118 total, for the 500,000 cells comparison, we used an scRNA-seq of 418,804 cells. All methods  
1119 were run with 3.1 GHz Intel i7 cores and 218 GB RAM.

1120

1121

1122



## 1123 References

- 1124 1. Becht, E. *et al.* Dimensionality reduction for visualizing single-cell data using UMAP. *Nat.*  
1125 *Biotechnol.* (2018) doi:10.1038/nbt.4314.
- 1126 2. Stoeckius, M. *et al.* Simultaneous epitope and transcriptome measurement in single cells.  
1127 *Nature Methods* vol. 14 865–868 (2017).
- 1128 3. Peterson, V. M. *et al.* Multiplexed quantification of proteins and transcripts in single cells.  
1129 *Nature Biotechnology* vol. 35 936–939 (2017).
- 1130 4. Klemm, S. L., Shipony, Z. & Greenleaf, W. J. Chromatin accessibility and the regulatory  
1131 epigenome. *Nat. Rev. Genet.* **20**, 207–220 (2019).
- 1132 5. Karemaker, I. D. & Vermeulen, M. Single-Cell DNA Methylation Profiling: Technologies and  
1133 Biological Applications. *Trends Biotechnol.* **36**, 952–965 (2018).
- 1134 6. Mayr, U., Serra, D. & Liberali, P. Exploring single cells in space and time during tissue  
1135 development, homeostasis and regeneration. *Development* **146**, (2019).
- 1136 7. Regev, A. *et al.* The Human Cell Atlas. *Elife* **6**, (2017).
- 1137 8. HuBMAP Consortium. The human body at cellular resolution: the NIH Human Biomolecular  
1138 Atlas Program. *Nature* **574**, 187–192 (2019).
- 1139 9. Efremova, M. & Teichmann, S. A. Computational methods for single-cell omics across  
1140 modalities. *Nat. Methods* **17**, 14–17 (2020).
- 1141 10. Lähnemann, D. *et al.* Eleven grand challenges in single-cell data science. *Genome Biol.* **21**,  
1142 31 (2020).
- 1143 11. Stuart, T. *et al.* Comprehensive Integration of Single-Cell Data. *Cell* vol. 177 1888–  
1144 1902.e21 (2019).
- 1145 12. Welch, J. D. *et al.* Single-Cell Multi-omic Integration Compares and Contrasts Features of  
1146 Brain Cell Identity. *Cell* vol. 177 1873–1887.e17 (2019).
- 1147 13. Lopez, R. *et al.* A joint model of unpaired data from scRNA-seq and spatial transcriptomics



- 1148 for imputing missing gene expression measurements. *arXiv [cs.LG]* (2019).
- 1149 14. GradientBased Learning Applied to Document Recognition. *Intelligent Signal Processing*  
1150 (2009) doi:10.1109/9780470544976.ch9.
- 1151 15. Chen, X., Miragaia, R. J., Natarajan, K. N. & Teichmann, S. A. A rapid and robust method  
1152 for single cell chromatin accessibility profiling. *Nat. Commun.* **9**, 5345 (2018).
- 1153 16. Granja, J. M. *et al.* Single-cell multiomic analysis identifies regulatory programs in mixed-  
1154 phenotype acute leukemia. *Nat. Biotechnol.* **37**, 1458–1465 (2019).
- 1155 17. Saunders, A. *et al.* Molecular Diversity and Specializations among the Cells of the Adult  
1156 Mouse Brain. *Cell* **174**, 1015–1030.e16 (2018).
- 1157 18. Wang, X. *et al.* Three-dimensional intact-tissue sequencing of single-cell transcriptional  
1158 states. *Science* **361**, (2018).
- 1159 19. Brodmann, K. *Brodmann's: Localisation in the Cerebral Cortex.* (Springer Science &  
1160 Business Media, 2007).
- 1161 20. Yao, Z. *et al.* An integrated transcriptomic and epigenomic atlas of mouse primary motor  
1162 cortex cell types. 2020.02.29.970558 (2020) doi:10.1101/2020.02.29.970558.
- 1163 21. Yamawaki, N., Borges, K., Suter, B. A., Harris, K. D. & Shepherd, G. M. G. A genuine layer  
1164 4 in motor cortex with prototypical synaptic circuit connectivity. *Elife* **3**, e05422 (2014).
- 1165 22. Barkas, N. *et al.* Joint analysis of heterogeneous single-cell RNA-seq dataset collections.  
1166 *Nat. Methods* **16**, 695–698 (2019).
- 1167 23. Peng, T., Chen, G. M. & Tan, K. GLUER: integrative analysis of single-cell omics and  
1168 imaging data by deep neural network. doi:10.1101/2021.01.25.427845.
- 1169 24. Muraro, M. J. *et al.* A Single-Cell Transcriptome Atlas of the Human Pancreas. *Cell Syst* **3**,  
1170 385–394.e3 (2016).
- 1171 25. Segerstolpe, Å. *et al.* Single-Cell Transcriptome Profiling of Human Pancreatic Islets in  
1172 Health and Type 2 Diabetes. *Cell Metab.* **24**, 593–607 (2016).
- 1173 26. Baron, M. *et al.* A Single-Cell Transcriptomic Map of the Human and Mouse Pancreas

- 1174 Reveals Inter- and Intra-cell Population Structure. *Cell Syst* **3**, 346–360.e4 (2016).
- 1175 27. Chazarra-Gil, R., van Dongen, S., Kiselev, V. Y. & Hemberg, M. Flexible comparison of  
1176 batch correction methods for single-cell RNA-seq using BatchBench. *Nucleic Acids Res.*  
1177 (2021) doi:10.1093/nar/gkab004.
- 1178 28. Roels, J. *et al.* Distinct and temporary-restricted epigenetic mechanisms regulate human  $\alpha\beta$   
1179 and  $\gamma\delta$  T cell development. *Nat. Immunol.* **21**, 1280–1292 (2020).
- 1180 29. Jia, G. *et al.* Single cell RNA-seq and ATAC-seq analysis of cardiac progenitor cell  
1181 transition states and lineage settlement. *Nat. Commun.* **9**, 4877 (2018).
- 1182 30. Chen, H. *et al.* Single-cell trajectories reconstruction, exploration and mapping of omics  
1183 data with STREAM. *Nat. Commun.* **10**, 1903 (2019).
- 1184 31. Park, J.-E. *et al.* A cell atlas of human thymic development defines T cell repertoire  
1185 formation. *Science* **367**, (2020).
- 1186 32. Hosokawa, H. & Rothenberg, E. V. How transcription factors drive choice of the T cell fate.  
1187 *Nature Reviews Immunology* (2020) doi:10.1038/s41577-020-00426-6.
- 1188 33. Hie, B., Cho, H., DeMeo, B., Bryson, B. & Berger, B. Geometric Sketching Compactly  
1189 Summarizes the Single-Cell Transcriptomic Landscape. *Cell Syst* **8**, 483–493.e7 (2019).
- 1190 34. Lecun, Y., Bottou, L., Bengio, Y. & Haffner, P. Gradient-based learning applied to document  
1191 recognition. *Proceedings of the IEEE* vol. 86 2278–2324 (1998).
- 1192 35. Hern, W. M. Correlation of fetal age and measurements between 10 and 26 weeks of  
1193 gestation. *Obstet. Gynecol.* **63**, 26–32 (1984).
- 1194 36. van den Brink, S. C. *et al.* Single-cell sequencing reveals dissociation-induced gene  
1195 expression in tissue subpopulations. *Nat. Methods* **14**, 935 (2017).
- 1196 37. Fang, R. *et al.* Fast and Accurate Clustering of Single Cell Epigenomes Reveals Cis-  
1197 Regulatory Elements in Rare Cell Types. doi:10.1101/615179.
- 1198 38. Schep, A. N., Wu, B., Buenrostro, J. D. & Greenleaf, W. J. chromVAR: inferring  
1199 transcription-factor-associated accessibility from single-cell epigenomic data. *Nat. Methods*

- 1200           **14**, 975–978 (2017).
- 1201    39. Blondel, V. D., Guillaume, J.-L., Lambiotte, R. & Lefebvre, E. Fast unfolding of communities  
1202           in large networks. *Journal of Statistical Mechanics: Theory and Experiment* vol. 2008  
1203           P10008 (2008).
- 1204    40. Haghverdi, L., Büttner, M., Wolf, F. A., Buettner, F. & Theis, F. J. Diffusion pseudotime  
1205           robustly reconstructs lineage branching. *Nat. Methods* **13**, 845 (2016).
- 1206    41. Wolf, F. A., Angerer, P. & Theis, F. J. SCANPY: large-scale single-cell gene expression  
1207           data analysis. *Genome Biol.* **19**, 15 (2018).
- 1208    42. Van den Berge, K. *et al.* Trajectory-based differential expression analysis for single-cell  
1209           sequencing data. *Nat. Commun.* **11**, 1201 (2020).
- 1210    43. Wolock, S. L., Lopez, R. & Klein, A. M. Scrublet: Computational Identification of Cell  
1211           Doublets in Single-Cell Transcriptomic Data. *Cell Syst* **8**, 281–291.e9 (2019).
- 1212    44. Grytten, I. *et al.* Graph Peak Caller: Calling ChIP-seq peaks on graph-based reference  
1213           genomes. *PLoS Comput. Biol.* **15**, e1006731 (2019).
- 1214    45. Zhu, X., Ghahramani, Z. & Lafferty, J. D. Semi-supervised learning using gaussian fields  
1215           and harmonic functions. in *Proceedings of the 20th International conference on Machine*  
1216           *learning (ICML-03)* 912–919 (2003).
- 1217    46. Pliner, H. A. *et al.* Cicero Predicts cis-Regulatory DNA Interactions from Single-Cell  
1218           Chromatin Accessibility Data. *Mol. Cell* **71**, 858–871.e8 (2018).
- 1219    47. Kozareva, V. *et al.* A transcriptomic atlas of the mouse cerebellum reveals regional  
1220           specializations and novel cell types. doi:10.1101/2020.03.04.976407.
- 1221    48. Rousseeuw, P. J. Silhouettes: A graphical aid to the interpretation and validation of cluster  
1222           analysis. *Journal of Computational and Applied Mathematics* vol. 20 53–65 (1987).

1223

1224
